# Supplementary material for: Droplet distribution in cotton canopy using single-rotor and four-rotor unmanned aerial vehicles
Source: PeerJ. 2022 Jun 14;10:e13572. doi: 10.7717/peerj.13572 (PMC9205310; doi:10.7717/peerj.13572)
Supplement: Supplemental Information 1 [file peerj-10-13572-s001.xls]

## Sheet: Data of all leaves
	single-rotor	T1	West	P1	P2	P3	P4	P5	P6	P7	P8	P9	P10	P11	North
L1	Head forward			0.004	0.004	0.002	0.3423	0.002	0.457	0.262	0.003	0.009	0.005	0.001
L2	1m			0.001	0	0.001	0.221	1.371	0.584	0	0.004	0.01	0.002	0.001
L3				0.001	0.004	0.001	0.172	0.001	0.375	0.206	0.032	0.006	0.001	0.004
L4				0.002	0	0	0.034	0.822	0.549	0.167	0	0.008	0.004	0.003
L5				0.005	0.001	0	0.022	0.384	0.324	0.235	0.001	0.004	0.001	0.004
L6				0.001	0	0.001	0.015	0.203	0.085	0.001	0.029	0.003	0.002	0.002
L7				0.003	0	0.001	0	0.008	0.086	0.005	0.005	0.002	0.001	0.004
L8				0	0.003	0.001	0.054	0.002	0.265	1.457	0.021	0.003	0.001	0.001
L9				0.002	0	0.028	0.066	0.111	0.095	0.041	0.001	0.003	0.004	0.004
L10				0.001	0.006	0.001	0	0.402	0.106	0.799	0.001	0.002	0.006	0.001
L11				0.002	0.001	0	0.005	0.027	0.424	1.611	0.023	0.003	0.005	0.001
L12				0.001	0.003	0	0.11	0.03	0.18	0.342	0.002	0.002	0.002	0.001
L13				0.001	0.001	0	0.755	0.195	0.058	0.56	0.007	0.001	0.001	0.001
L14				0	0.004	0.012	0.132	0.131	0.637	0.018	0.005	0.002	0.003	0
L15				0	0.003	0	0.002	0.038	0.224	0.746	0.005	0.008	0.002	0.002
L16				0	0	0	0.37	0.24	0.031	0.05	0.012	0.001	0.001	0.001
L17				0.002	0	0.001	0.007	0.283	0.003	0.053	0.002	0.004	0.003	0.001
L18				0.001	0.003	0.001	0.002	0.054	0.046	0.001	0.033	0.002	0.001	0
L19				0	0	0.005	0.001	0.439	0.046	0.023	0.046	0	0.001	0
L20				0	0	0.001	0.019	0.003	0.365	0.026	0.003	0.001	0.001	0.001
L21				0	0.002	0.001	0.072	0.013	0.004	0.104	0.016	0.002	0	0
L22				0	0.001	0.004	0.002	0.003	0.001	0.113	0.002	0.014	0	0.003
L23				0.001	0.004	0.001	0.049	0.216	0.007	0.249	0.006	0.003	0.001	0.003
L24				0.001	0.001	0.003	0.001	0.139	0.012	0.104	0.004	0.002	0.002	0
L25				0.004	0.002	0.01	0.038	0.009	0.024	0.027	0.003	0.002	0.003	0
L26				0.001	0.001	0.003	0.001	0.149	0.005	0.005	0.011	0.005	0.004	0.004
L27				0.00166667	0.001	0.001	0.001	0.008	0.001	0.037	0.003	0.006	0.002	0.001
Mean				0.00132099	0.00166667	0.00292593	0.0923444	0.195667	0.184963	0.268222	0.0103704	0.004	0.00218519	0.00162963
	single-rotor	T2
	Head forward			P1	P2	P3	P4	P5	P6	P7	P8	P9	P10	P11
L1	2m			0.027	0.005	0.009	0.014	0.009	1.6015	0.278	0.128	0.06	0.003	0.004
L2				0.001	0.002	0.01	0.118	0.412	0.005	0.017	0.131	0.118	0.004	0.003
L3				0.021	0.001	0.006	0.069	0.003	0.7635	0	0.176	0.169	0	0.005
L4				0.011	0.004	0.008	0.041	0.007	0.47	0.043	0.037	0.032	0.032	0.001
L5				0.002	0.001	0.004	0.036	0.008	0.025	0.336	0.09	0.023	0	0.001
L6				0.002	0.002	0.003	0.138	0.617	0.001	0.002	0.03	0.291	0.001	0.002
L7				0.005	0.001	0.002	0.006	0	0.109	0.009	0.01	0.094	0.029	0.002
L8				0.012	0.001	0.003	0	0.002	0.004	0.899	0.153	0.025	0.005	0.001
L9				0	0.004	0.003	0.008	0.716	1.2915	0.103	0.013	0.008	0.021	0.004
L10				0.004	0.006	0.002	0.036	0.017	0.393	0.037	0.105	0.081	0.001	0.002
L11				0.005	0.005	0.003	0.018	0.098	0.001	0	0.092	0.015	0.001	0.001
L12				0.003	0.002	0.002	0.045	0.005	0.073	0.022	0.059	0.003	0.023	0.001
L13				0.045	0.001	0.001	0.067	0.059	0.001	0.187	0.134	0.047	0.002	0.001
L14				0.001	0.003	0.002	0.028	0.001	0.003	0.184	0.008	0	0.007	0
L15				0.014	0.002	0.008	0.123	0.002	0	0.363	0.005	0	0.005	0.001
L16				0	0.001	0.001	0.031	0.109	0.076	0.189	0.023	0.017	0.005	0.001
L17				0.014	0.003	0.004	0.189	0.004	0.007	0.032	0.02	0.031	0.012	0.001
L18				0.003	0.001	0.002	0.08	0.007	0.003	0.119	0.067	0.02	0.051	0
L19				0.002	0.001	0	0.008	0	0.037	0.239	0.002	0	0.002	0
L20				0.001	0.001	0.001	0	0.003	0.019	0.022	0.0641667	0.119	0.033	0
L21				0.002	0	0.002	0.006	0	0.026	0.025	0.038	0.002	0	0
L22				0.005	0	0.014	0.007	0.024	0	0.127	0.192	0	0.046	0.004
L23				0.00818182	0.001	0.003	0.004	0.007	0.116	0.346	0.032	0.01	0.003	0.001
L24				0	0.002	0.002	0.003	0.009	0.2185	0.03	0.0462593	0.013	0.016	0
L25				0	0.003	0.002	0.117	0.002	0.021	0.004	0.003	0.064	0.002	0
L26				0.002	0.004	0.005	0.02	0.06	0.001	0.14452	0.004	0	0.008	0.003
L27				0	0.002	0.006	0.037	0	0	0.0117037	0.00218519	0.002	0.004	0.001
Mean				0.00704377	0.00218519	0.004	0.0462593	0.0807778	0.195037	0.139601	0.0616523	0.0460741	0.0117037	0.00148148
	single-rotor	T3
	Head forward			P1	P2	P3	P4	P5	P6	P7	P8	P9	P10	P11
L1	3m			0.013	0.001	0	0.097	0	1.16	0.026	0.022	0.004	0.008	0.001
L2				0.006	0	0.001	0	0.125	0.562	0.297	0.033	0	0	0
L3				0.006	0.003	0.004	0	0.165	0.224	0.059	0.036	0.001	0	0
L4				0	0	0.104	0.033	0.774	1.102	0.064	0.006	0.011	0.005	0.001
L5				0.005	0	0	0	0.069	0	0.014	0.304	0	0	0
L6				0.003	0	0	0	0.01	0.334	0.06	0.013	0	0.009	0.001
L7				0.001	0.001	0.006	0.126	0.057	0.037	0.085	0.025	0	0	0
L8				0.003	0.001	0	0.016	0.343	0.102	0.001	0	0.008	0	0
L9				0.005	0.004	0	0.366	0.08	0.749	0.002	0.003	0	0	0.002
L10				0.002	0.003	0.132	0.419	0.001	0.167	0.008	0	0	0	0.001
L11				0.007	0.002	0.048	0.005	0.37	0	0.077	0.013	0.002	0	0
L12				0.004	0.001	0	0	0.012	0	0.026	0.002	0.001	0.001	0
L13				0.013	0	0.001	0.024	0.004	0.382	0.128	0.002	0	0	0
L14				0.001	0.005	0.002	0.202	0	0.043	0.078	0.031	0	0	0
L15				0.002	0.006	0	0.212	0.023	0.006	0.033	0.001	0.061	0	0
L16				0	0	0.001	0.229	0.188	0.014	0.087	0	0	0.004	0
L17				0.001	0.005	0	0	0.001	0.027	0.075	0	0.024	0	0
L18				0.001	0.013	0	0	0.013	0	0.082	0.002	0.001	0.003	0
L19				0.005	0.001	0	0.001	0.007	0	0.003	0.001	0	0.001	0
L20				0.00410526	0.002	0.001	0.007	0.007	0.143	0.018	0	0.001	0	0
L21				0	0.015	0.009	0.004	0.003	0.018	0	0.017	0.003	0.001	0.001
L22				0	0	0.008	0	0.878	0.022	0.034	0.027	0	0.001	0.001
L23				0	0.039	0.024	0.743	0.877	0.076	0.002	0.001	0.003	0.001	0.001
L24				0.001	0.053	0.024	0.959	0.439	0.005	0	0.022	0	0.003	0
L25				0	0.007	0.046	0.54	0.001	0.001	0	0.006	0.003	0.002	0
L26				0.002	0.00648	0.003	0.15932	0.17788	0.089	0.002	0.015	0	0.002	0
L27				0.000333333	0	0.016	0	0	0.001	0.085	0.05	0	0.002	0
Mean				0.00316439	0.00455556	0.0159259	0.153419	0.171292	0.194963	0.0498519	0.0234074	0.00455556	0.00159259	0.000333333
	single-rotor	T4
	Tail forward			P1	P2	P3	P4	P5	P6	P7	P8	P9	P10	P11
L1	1m			0.01	0.005	0.029	0.107	0.032	0.63	0.22	0.083	0.202	0.009	0
L2				0.001	0.002	0.046	0.003	0.004	0.241	0.292	0.087	0.043	0.044	0.001
L3				0.01	0.003	0.013	0.017	0.169	0.138	0.972	0.027	0.016	0.006	0
L4				0	0.002	0.007	0.033	0.06	0.437	0.55	0.039	0.014	0.016	0.004
L5				0.005	0.009	0.007	0.053	0.042	0.004	0.406	0.118	0.001	0.005	0
L6				0.003	0.013	0.032	0.013	0.057	0.067	0.615	0.008	0.021	0.04	0.013
L7				0.026	0	0.006	0.006	0.056	0.028	0.304	0	0.013	0.036	0
L8				0.004	0.005	0	0.049	0.02	0.025	0.034	0.011	0.028	0	0
L9				0	0.003	0.001	0.021	0.134	0.121	0	0.013	0.024	0.008	0.006
L10				0.006	0.014	0.028	0.015	0	0.013	0.095	0.003	0.033	0.027	0.005
L11				0	0.002	0.072	0	0.006	0.001	0.177	0.007	0.016	0.006	0.001
L12				0.001	0.007	0.017	0.031	0.031	0.109	0.002	0.056	0.006	0.001	0.005
L13				0.002	0.003	0.01	0.019	0.001	0.507	0.055	0.003	0.016	0.008	0.001
L14				0	0.009	0.01	0.005	0.037	0.014	0.084	0.077	0.037	0.013	0.009
L15				0.009	0.007	0.008	0.015	0.006	0.013	0.044	0.01	0.065	0.001	0.005
L16				0.005	0.008	0.001	0.017	0.03	0.013	0.086	0.008	0.001	0.021	0.002
L17				0.006	0.01	0.003	0.019	0.016	0	0.105	0.017	0.028	0.005	0.002
L18				0.001	0.004	0.003	0.019	0.041	0.004	0.007	0.003	0.013	0.041	0
L19				0.003	0.006	0.006	0.007	0.01	0.002	0.212	0.005	0.009	0.011	0
L20				0.001	0.002	0.004	0.003	0.003	0.547	0.065	0.06	0.006	0.002	0.004
L21				0.004	0.006	0.003	0.01	0.003	0.65	0.011	0.006	0.004	0.005	0.005
L22				0.003	0.003	0.005	0.11	0.149	0.098	0	0.009	0.012	0	0
L23				0.00454545	0.001	0.01	0	0.001	0.059	0.011	0.036	0.009	0.002	0
L24				0	0.002	0.005	0.024	0.081	0.034	0.092	0.012	0.007	0.026	0
L25				0	0.006	0.001	0.022	0.008	0.01	0.088	0.02	0.002	0.026	0
L26				0.001	0.002	0.004	0.011	0.03988	0.015	0.076	0.009	0.024	0.005	0.002
L27				0.004	0.002	0.0127308	0.009	0.082	0.003	0.021	0.006	0.011	0.014	0
Mean				0.00405724	0.00503704	0.0127308	0.0236296	0.04144	0.140111	0.171259	0.0271481	0.0244815	0.014	0.00240741
	single-rotor	T5
	Tail forward			P1	P2	P3	P4	P5	P6	P7	P8	P9	P10	P11
L1	2m			0.034	0.004	0	0.097	0.146	0.02	0.059	0.132	0.192	0.008	0.013
L2				0.003	0	0	0.002	0.1	0.006	0.598	0.223	0.068	0.002	0.003
L3				0	0.001	0.001	0.015	0.041	0.042	0.632	0.059	0.01	0	0.005
L4				0.007	0.013	0.002	0.008	0.046	0.129	0.177	0.026	0.234	0.001	0.004
L5				0	0.019	0.001	0.255	0.039	0.01	0.016	0.193	0.023	0.002	0
L6				0.018	0.014	0.003	0.053	0.101	0.014	0.46	0.023	0.058	0.004	0.01
L7				0.007	0.003	0.001	0.006	0.049	0.141	0.123	0.238	0.119	0.002	0.003
L8				0.021	0.008	0	0.036	0.057	0.006	0.014	0.04	0.031	0.001	0.004
L9				0	0.003	0	0.159	0.059	0.055	0.006	0.019	0.01	0.002	0.01
L10				0	0	0.001	0.031	0.017	0.024	0.044	0.029	0.018	0	0.048
L11				0	0.005	0.002	0.049	0.032	0.017	0	0.006	0.079	0	0.005
L12				0	0	0	0.003	0.059	0.075	0.342	0.017	0	0	0.011
L13				0	0.001	0	0.004	0.014	0.061	0.137	0.109	0.046	0	0.003
L14				0	0	0	0.005	0.045	0.061	0.04	0.046	0.024	0	0.006
L15				0	0	0	0.015	0.002	0.021	0.302	0.009	0.032	0.001	0.007
L16				0	0	0.004	0.011	0.026	0.032	0.046	0.015	0.014	0	0.003
L17				0	0	0.002	0.004	0.016	0.016	0.01	0.018	0.032	0	0.01
L18				0	0	0.001	0.005	0.015	0.006	0.122	0.017	0.003	0.003	0.005
L19				0	0	0	0.005	0.011	0.002	0.002	0.031	0.005	0	0.003
L20				0	0	0	0.002	0.005	0.232	0.006	0.036	0.003	0	0.014
L21				0	0	0	0.016	0.004	0.094	0.006	0.007	0.01	0.002	0.005
L22				0	0	0	0.039	0.041	0.031	0.01	0.013	0.029	0	0.062
L23				0	0	0	0.03	0.086	0.025	0.02	0.026	0.005	0	0.027
L24				0	0	0	0.073	0.09	0.021	0.011	0.009	0.006	0	0
L25				0	0	0	0.074	0	0.007	0.057	0.01	0.001	0	0.002
L26				0	0	0.001	0.007	0	0.02	0.057	0.021	0.003	0.001	0
L27				0	0	0	0.006	0	0.019	0	0.007	0.026	0	0
Mean				0.00333333	0.00262963	0.000703704	0.0374074	0.0407778	0.043963	0.122111	0.0510741	0.040037	0.00107407	0.00974074
	single-rotor	T6
	Tail forward			P1	P2	P3	P4	P5	P6	P7	P8	P9	P10	P11
L1	3m			0	0.003	0.004	0.123	0.122	0.136	0.012	0.025	0.172	0.006	0.008
L2				0	0.008	0	0	0.008	0.001	0.159	0.009	0.002	0.043	0
L3				0	0.02	0.018	0.004	0.002	0.008	0.005	0.015	0.009	0.014	0
L4				0	0.011	0.006	0.127	0.01	0.004	0.001	0.034	0.14	0.01	0
L5				0	0	0.001	0.13	0.024	0.062	0	0.022	0.02	0	0
L6				0	0	0.024	0	0.024	0.019	0	0.007	0.025	0	0
L7				0	0	0.015	0.004	0.003	0.011	0	0.003	0.042	0	0
L8				0	0	0.012	0.028	0.007	0.01	0.011	0.006	0.004	0	0
L9				0	0	0.006	0.037	0.001	0.004	0.007	0.021	0.011	0	0
L10				0	0	0.008	0.02	0	0.051	0.003	0	0.006	0	0
L11				0	0	0	0.13	0.012	0	0.123	0.008	0.07	0	0
L12				0	0	0.006	0.005	0.001	0	0.051	0.018	0.01	0	0
L13				0	0	0	0.009	0.007	0.064	0.044	0.019	0.076	0	0
L14				0	0	0	0.007	0.01	0.008	0.007	0.076	0.016	0	0
L15				0	0	0.005	0.014	0.005	0.009	0	0.018	0.006	0	0
L16				0	0	0.011	0.008	0.024	0.014	0	0.007	0.012	0	0
L17				0	0	0.004	0.019	0	0.022	0.004	0.008	0.023	0	0
L18				0	0	0	0.011	0.005	0	0.087	0.015	0.006	0	0
L19				0	0	0	0.003	0.003	0	0.093	0.018	0.004	0	0
L20				0	0	0.008	0.002	0	0.052	0.013	0.008	0	0	0
L21				0	0	0.005	0.015	0	0.084	0	0.012	0	0	0
L22				0	0	0.012	0.001	0.053	0.03	0.003	0.004	0.05	0	0
L23				0	0	0.001	0.035	0.041	0	0	0.005	0.007	0	0
L24				0	0	0.003	0.002	0.03	0.011	0.009	0.006	0.003	0	0
L25				0	0	0.003	0.06	0.003	0.006	0.056	0.002	0.005	0	0
L26				0	0	0.003	0.022	0	0.008	0.011	0.008	0.007	0	0
L27				0	0	0.006	0.025	0	0.005	0.049	0.005	0.017	0	0
Mean				0	0.00155556	0.00596296	0.0311481	0.0146296	0.0229259	0.0277037	0.014037	0.0275185	0.0027037	0.000296296

## Sheet: Leaves divided into three layer
	Single-rotor	T1	West	P1	P2	P3	P4	P5	P6	P7	P8	P9	P10	P11
L1	single-rotor			0.004	0.004	0.002	0.3423	0.002	0.457	0.262	0.003	0.009	0.005	0.001
L2	Head forward			0.001	0	0.001	0.221	1.371	0.584	0	0.004	0.01	0.002	0.001
L3				0.001	0.004	0.001	0.172	0.001	0.375	0.206	0.032	0.006	0.001	0.004
L4				0.002	0	0	0.034	0.822	0.549	0.167	0	0.008	0.004	0.003
L5				0.005	0.001	0	0.022	0.384	0.324	0.235	0.001	0.004	0.001	0.004
L6				0.001	0	0.001	0.015	0.203	0.085	0.001	0.029	0.003	0.002	0.002
L7				0.003	0	0.001	0	0.008	0.086	0.005	0.005	0.002	0.001	0.004
L8				0	0.003	0.001	0.054	0.002	0.265	1.457	0.021	0.003	0.001	0.001
L9				0.002	0	0.028	0.066	0.111	0.095	0.041	0.001	0.003	0.004	0.004
Mean				0.00211111	0.00133333	0.00388889	0.102922	0.322667	0.313333	0.263778	0.0106667	0.00533333	0.00233333	0.00266667
L10				0.001	0.006	0.001	0	0.402	0.106	0.799	0.001	0.002	0.006	0.001
L11				0.002	0.001	0	0.005	0.027	0.424	1.611	0.023	0.003	0.005	0.001
L12				0.001	0.003	0	0.11	0.03	0.18	0.342	0.002	0.002	0.002	0.001
L13				0.001	0.001	0	0.755	0.195	0.058	0.56	0.007	0.001	0.001	0.001
L14				0	0.004	0.012	0.132	0.131	0.637	0.018	0.005	0.002	0.003	0
L15				0	0.003	0	0.002	0.038	0.224	0.746	0.005	0.008	0.002	0.002
L16				0	0	0	0.37	0.24	0.031	0.05	0.012	0.001	0.001	0.001
L17				0.002	0	0.001	0.007	0.283	0.003	0.053	0.002	0.004	0.003	0.001
L18				0.001	0.003	0.001	0.002	0.054	0.046	0.001	0.033	0.002	0.001	0
Mean				0.000888889	0.00233333	0.00166667	0.153667	0.155556	0.189889	0.464444	0.01	0.00277778	0.00266667	0.000888889
L19				0	0	0.005	0.001	0.439	0.046	0.023	0.046	0	0.001	0
L20				0	0	0.001	0.019	0.003	0.365	0.026	0.003	0.001	0.001	0.001
L21				0	0.002	0.001	0.072	0.013	0.004	0.104	0.016	0.002	0	0
L22				0	0.001	0.004	0.002	0.003	0.001	0.113	0.002	0.014	0	0.003
L23				0.001	0.004	0.001	0.049	0.216	0.007	0.249	0.006	0.003	0.001	0.003
L24				0.001	0.001	0.003	0.001	0.139	0.012	0.104	0.004	0.002	0.002	0
L25				0.004	0.002	0.01	0.038	0.009	0.024	0.027	0.003	0.002	0.003	0
L26				0.001	0.001	0.003	0.001	0.149	0.005	0.005	0.011	0.005	0.004	0.004
L27				0.000875	0.001	0.001	0.001	0.008	0.001	0.037	0.003	0.006	0.002	0.001
Mean				0.000875	0.00133333	0.00322222	0.0204444	0.108778	0.0516667	0.0764444	0.0104444	0.00388889	0.00155556	0.00133333
		T2		P1	P2	P3	P4	P5	P6	P7	P8	P9	P10	P11
L1				0.027	0.005	0.009	0.014	0.009	1.6015	0.278	0.128	0.06	0.003	0.004
L2				0.001	0.002	0.01	0.118	0.412	0.005	0.017	0.131	0.118	0.004	0.003
L3				0.021	0.001	0.006	0.069	0.003	0.7635	0	0.176	0.169	0	0.005
L4				0.011	0.004	0.008	0.041	0.007	0.47	0.043	0.037	0.032	0.032	0.001
L5				0.002	0.001	0.004	0.036	0.008	0.025	0.336	0.09	0.023	0	0.001
L6				0.002	0.002	0.003	0.138	0.617	0.001	0.002	0.03	0.291	0.001	0.002
L7				0.005	0.001	0.002	0.006	0	0.109	0.009	0.01	0.094	0.029	0.002
L8				0.012	0.001	0.003	0	0.002	0.004	0.899	0.153	0.025	0.005	0.001
L9				0	0.004	0.003	0.008	0.716	1.2915	0.103	0.013	0.008	0.021	0.004
Mean				0.009	0.00233333	0.00533333	0.0477778	0.197111	0.4745	0.187444	0.0853333	0.0911111	0.0105556	0.00255556
L10				0.004	0.006	0.002	0.036	0.017	0.393	0.037	0.105	0.081	0.001	0.002
L11				0.005	0.005	0.003	0.018	0.098	0.001	0	0.092	0.015	0.001	0.001
L12				0.003	0.002	0.002	0.045	0.005	0.073	0.022	0.059	0.003	0.023	0.001
L13				0.045	0.001	0.001	0.067	0.059	0.001	0.187	0.134	0.047	0.002	0.001
L14				0.001	0.003	0.002	0.028	0.001	0.003	0.184	0.008	0	0.007	0
L15				0.014	0.002	0.008	0.123	0.002	0	0.363	0.005	0	0.005	0.001
L16				0	0.001	0.001	0.031	0.109	0.076	0.189	0.023	0.017	0.005	0.001
L17				0.014	0.003	0.004	0.189	0.004	0.007	0.032	0.02	0.031	0.012	0.001
L18				0.003	0.001	0.002	0.08	0.007	0.003	0.119	0.067	0.02	0.051	0
Mean				0.00988889	0.00266667	0.00277778	0.0685556	0.0335556	0.0618889	0.125889	0.057	0.0237778	0.0118889	0.000888889
L19				0.002	0.001	0	0.008	0	0.037	0.239	0.002	0	0.002	0
L20				0.001	0.001	0.001	0	0.003	0.019	0.022	0.0648667	0.119	0.033	0
L21				0.002	0	0.002	0.006	0	0.026	0.025	0.038	0.002	0	0
L22				0.005	0	0.014	0.007	0.024	0	0.127	0.192	0	0.046	0.004
L23				0.00828704	0.001	0.003	0.004	0.007	0.116	0.346	0.032	0.01	0.003	0.001
L24				0	0.002	0.002	0.003	0.009	0.222476	0.03	0.0470805	0.013	0.016	0
L25				0	0.003	0.002	0.117	0.002	0.021	0.004	0.003	0.064	0.002	0
L26				0.002	0.004	0.005	0.02	0.06	0.001	0.14542	0.00400383	0	0.008	0.003
L27				0	0.002	0.006	0.037	0	0	0.0116705	0.0022069	0.002	0.004	0.001
Mean				0.00225412	0.00155556	0.00388889	0.0224444	0.0116667	0.049164	0.105566	0.0427953	0.0233333	0.0126667	0.001
		T3		P1	P2	P3	P4	P5	P6	P7	P8	P9	P10	P11
L1				0.013	0.001	0	0.097	0	1.16	0.026	0.022	0.004	0.008	0.001
L2				0.006	0	0.001	0	0.125	0.562	0.297	0.033	0	0	0
L3				0.006	0.003	0.004	0	0.165	0.224	0.059	0.036	0.001	0	0
L4				0	0	0.104	0.033	0.774	1.102	0.064	0.006	0.011	0.005	0.001
L5				0.005	0	0	0	0.069	0	0.014	0.304	0	0	0
L6				0.003	0	0	0	0.01	0.334	0.06	0.013	0	0.009	0.001
L7				0.001	0.001	0.006	0.126	0.057	0.037	0.085	0.025	0	0	0
L8				0.003	0.001	0	0.016	0.343	0.102	0.001	0	0.008	0	0
L9				0.005	0.004	0	0.366	0.08	0.749	0.002	0.003	0	0	0.002
SD						0.0342775	0.120083	0.245307	0.445039	0.0911141	0.0964475	0.00415331
L10				0.002	0.003	0.132	0.419	0.001	0.167	0.008	0	0	0	0.001
L11				0.007	0.002	0.048	0.005	0.37	0	0.077	0.013	0.002	0	0
L12				0.004	0.001	0	0	0.012	0	0.026	0.002	0.001	0.001	0
L13				0.013	0	0.001	0.024	0.004	0.382	0.128	0.002	0	0	0
L14				0.001	0.005	0.002	0.202	0	0.043	0.078	0.031	0	0	0
L15				0.002	0.006	0	0.212	0.023	0.006	0.033	0.001	0.061	0	0
L16				0	0	0.001	0.229	0.188	0.014	0.087	0	0	0.004	0
L17				0.001	0.005	0	0	0.001	0.027	0.075	0	0.024	0	0
L18				0.001	0.013	0	0	0.013	0	0.082	0.002	0.001	0.003	0
Mean				0.00344444	0.00388889	0.0204444	0.121222	0.068	0.071	0.066	0.00566667	0.00988889	0.000888889	0.000111111
L19				0.005	0.001	0	0.001	0.007	0	0.003	0.001	0	0.001	0
L20				0.00407222	0.002	0.001	0.007	0.007	0.143	0.018	0	0.001	0	0
L21				0	0.015	0.009	0.004	0.003	0.018	0	0.017	0.003	0.001	0.001
L22				0	0	0.008	0	0.878	0.022	0.034	0.027	0	0.001	0.001
L23				0	0.039	0.024	0.743	0.877	0.076	0.002	0.001	0.003	0.001	0.001
L24				0.001	0.053	0.024	0.959	0.439	0.005	0	0.022	0	0.003	0
L25				0	0.007	0.046	0.54	0.001	0.001	0	0.006	0.003	0.002	0
L26				0.002	0.00648	0.003	0.156456	0.176308	0.089	0.002	0.015	0	0.002	0
L27				0.00032567	0	0.016	0	0	0.001	0.085	0.05	0	0.002	0
Mean				0.00137754	0	0.0145556	0.267828	0.265368	0.0394444	0.016	0.0154444	0.00111111	0.00144444	0.000333333
		T4		P1	P2	P3	P4	P5	P6	P7	P8	P9	P10	P11
L1				0.01	0.005	0.029	0.107	0.032	0.63	0.22	0.083	0.202	0.009	0
L2				0.001	0.002	0.046	0.003	0.004	0.241	0.292	0.087	0.043	0.044	0.001
L3				0.01	0.003	0.013	0.017	0.169	0.138	0.972	0.027	0.016	0.006	0
L4				0	0.002	0.007	0.033	0.06	0.437	0.55	0.039	0.014	0.016	0.004
L5				0.005	0.009	0.007	0.053	0.042	0.004	0.406	0.118	0.001	0.005	0
L6				0.003	0.013	0.032	0.013	0.057	0.067	0.615	0.008	0.021	0.04	0.013
L7				0.026	0	0.006	0.006	0.056	0.028	0.304	0	0.013	0.036	0
L8				0.004	0.005	0	0.049	0.02	0.025	0.034	0.011	0.028	0	0
L9				0	0.003	0.001	0.021	0.134	0.121	0	0.013	0.024	0.008	0.006
Mean				0.00655556	0.00466667	0.0156667	0.0335556	0.0637778	0.187889	0.377	0.0428889	0.0402222	0.0182222	0.00266667
L10				0.006	0.014	0.028	0.015	0	0.013	0.095	0.003	0.033	0.027	0.005
L11				0	0.002	0.072	0	0.006	0.001	0.177	0.007	0.016	0.006	0.001
L12				0.001	0.007	0.017	0.031	0.031	0.109	0.002	0.056	0.006	0.001	0.005
L13				0.002	0.003	0.01	0.019	0.001	0.507	0.055	0.003	0.016	0.008	0.001
L14				0	0.009	0.01	0.005	0.037	0.014	0.084	0.077	0.037	0.013	0.009
L15				0.009	0.007	0.008	0.015	0.006	0.013	0.044	0.01	0.065	0.001	0.005
L16				0.005	0.008	0.001	0.017	0.03	0.013	0.086	0.008	0.001	0.021	0.002
L17				0.006	0.01	0.003	0.019	0.016	0	0.105	0.017	0.028	0.005	0.002
L18				0.001	0.004	0.003	0.019	0.041	0.004	0.007	0.003	0.013	0.041	0
Mean				0.00333333	0.00711111	0.0168889	0.0155556	0.0186667	0.0748889	0.0727778	0.0204444	0.0238889	0.0136667	0.00333333
L19				0.003	0.006	0.006	0.007	0.01	0.002	0.212	0.005	0.009	0.011	0
L20				0.001	0.002	0.004	0.003	0.003	0.547	0.065	0.06	0.006	0.002	0.004
L21				0.004	0.006	0.003	0.01	0.003	0.65	0.011	0.006	0.004	0.005	0.005
L22				0.003	0.003	0.005	0.11	0.149	0.098	0	0.009	0.012	0	0
L23				0.0045787	0.001	0.01	0	0.001	0.059	0.011	0.036	0.009	0.002	0
L24				0	0.002	0.005	0.024	0.081	0.034	0.092	0.012	0.007	0.026	0
L25				0	0.006	0.001	0.022	0.008	0.01	0.088	0.02	0.002	0.026	0
L26				0.001	0.002	0.004	0.011	0.0399794	0.015	0.076	0.009	0.024	0.005	0.002
L27				0.004	0.002	0.0129841	0.009	0.082	0.003	0.021	0.006	0.011	0.0141389	0
Mean				0.00228652	0.00333333	0.0056649	0.0217778	0.0418866	0.157556	0.064	0.0181111	0.00933333	0.0101265	0.00122222
		T5		P1	P2	P3	P4	P5	P6	P7	P8	P9	P10	P11
L1				0.034	0.004	0	0.097	0.146	0.02	0.059	0.132	0.192	0.008	0.013
L2				0.003	0	0	0.002	0.1	0.006	0.598	0.223	0.068	0.002	0.003
L3				0	0.001	0.001	0.015	0.041	0.042	0.632	0.059	0.01	0	0.005
L4				0.007	0.013	0.002	0.008	0.046	0.129	0.177	0.026	0.234	0.001	0.004
L5				0	0.019	0.001	0.255	0.039	0.01	0.016	0.193	0.023	0.002	0
L6				0.018	0.014	0.003	0.053	0.101	0.014	0.46	0.023	0.058	0.004	0.01
L7				0.007	0.003	0.001	0.006	0.049	0.141	0.123	0.238	0.119	0.002	0.003
L8				0.021	0.008	0	0.036	0.057	0.006	0.014	0.04	0.031	0.001	0.004
L9				0	0.003	0	0.159	0.059	0.055	0.006	0.019	0.01	0.002	0.01
Mean				0.01	0.00722222	0.000888889	0.0701111	0.0708889	0.047	0.231667	0.105889	0.0827778	0.00244444	0.00577778
L10				0	0	0.001	0.031	0.017	0.024	0.044	0.029	0.018	0	0.048
L11				0	0.005	0.002	0.049	0.032	0.017	0	0.006	0.079	0	0.005
L12				0	0	0	0.003	0.059	0.075	0.342	0.017	0	0	0.011
L13				0	0.001	0	0.004	0.014	0.061	0.137	0.109	0.046	0	0.003
L14				0	0	0	0.005	0.045	0.061	0.04	0.046	0.024	0	0.006
L15				0	0	0	0.015	0.002	0.021	0.302	0.009	0.032	0.001	0.007
L16				0	0	0.004	0.011	0.026	0.032	0.046	0.015	0.014	0	0.003
L17				0	0	0.002	0.004	0.016	0.016	0.01	0.018	0.032	0	0.01
L18				0	0	0.001	0.005	0.015	0.006	0.122	0.017	0.003	0.003	0.005
Mean				0	0.000666667	0.00111111	0.0141111	0.0251111	0.0347778	0.115889	0.0295556	0.0275556	0.000444444	0.0108889
L19				0	0	0	0.005	0.011	0.002	0.002	0.031	0.005	0	0.003
L20				0	0	0	0.002	0.005	0.232	0.006	0.036	0.003	0	0.014
L21				0	0	0	0.016	0.004	0.094	0.006	0.007	0.01	0.002	0.005
L22				0	0	0	0.039	0.041	0.031	0.01	0.013	0.029	0	0.062
L23				0	0	0	0.03	0.086	0.025	0.02	0.026	0.005	0	0.027
L24				0	0	0	0.073	0.09	0.021	0.011	0.009	0.006	0	0
L25				0	0	0	0.074	0	0.007	0.057	0.01	0.001	0	0.002
L26				0	0	0.001	0.007	0	0.02	0.057	0.021	0.003	0.001	0
L27				0	0	0	0.006	0	0.019	0	0.007	0.026	0	0
Mean				0	0	0.000111111	0.028	0.0263333	0.0501111	0.0187778	0.0177778	0.00977778	0.000333333	0.0125556
		T6		P1	P2	P3	P4	P5	P6	P7	P8	P9	P10	P11
L1				0	0.003	0.004	0.123	0.122	0.136	0.012	0.025	0.172	0.006	0.008
L2				0	0.008	0	0	0.008	0.001	0.159	0.009	0.002	0.043	0
L3				0	0.02	0.018	0.004	0.002	0.008	0.005	0.015	0.009	0.014	0
L4				0	0.011	0.006	0.127	0.01	0.004	0.001	0.034	0.14	0.01	0
L5				0	0	0.001	0.13	0.024	0.062	0	0.022	0.02	0	0
L6				0	0	0.024	0	0.024	0.019	0	0.007	0.025	0	0
L7				0	0	0.015	0.004	0.003	0.011	0	0.003	0.042	0	0
L8				0	0	0.012	0.028	0.007	0.01	0.011	0.006	0.004	0	0
L9				0	0	0.006	0.037	0.001	0.004	0.007	0.021	0.011	0	0
Mean				0	0.00466667	0.00955556	0.0503333	0.0223333	0.0283333	0.0216667	0.0157778	0.0472222	0.00811111	0.000888889
L10				0	0	0.008	0.02	0	0.051	0.003	0	0.006	0	0
L11				0	0	0	0.13	0.012	0	0.123	0.008	0.07	0	0
L12				0	0	0.006	0.005	0.001	0	0.051	0.018	0.01	0	0
L13				0	0	0	0.009	0.007	0.064	0.044	0.019	0.076	0	0
L14				0	0	0	0.007	0.01	0.008	0.007	0.076	0.016	0	0
L15				0	0	0.005	0.014	0.005	0.009	0	0.018	0.006	0	0
L16				0	0	0.011	0.008	0.024	0.014	0	0.007	0.012	0	0
L17				0	0	0.004	0.019	0	0.022	0.004	0.008	0.023	0	0
L18				0	0	0	0.011	0.005	0	0.087	0.015	0.006	0	0
Mean				0	0	0.00377778	0.0247778	0.00711111	0.0186667	0.0354444	0.0187778	0.025	0	0
L19				0	0	0	0.003	0.003	0	0.093	0.018	0.004	0	0
L20				0	0	0.008	0.002	0	0.052	0.013	0.008	0	0	0
L21				0	0	0.005	0.015	0	0.084	0	0.012	0	0	0
L22				0	0	0.012	0.001	0.053	0.03	0.003	0.004	0.05	0	0
L23				0	0	0.001	0.035	0.041	0	0	0.005	0.007	0	0
L24				0	0	0.003	0.002	0.03	0.011	0.009	0.006	0.003	0	0
L25				0	0	0.003	0.06	0.003	0.006	0.056	0.002	0.005	0	0
L26				0	0	0.003	0.022	0	0.008	0.011	0.008	0.007	0	0
L27				0	0	0.006	0.025	0	0.005	0.049	0.005	0.017	0	0
Mean				0	0	0.00455556	0.0183333	0.0144444	0.0217778	0.026	0.00755556	0.0103333	0	0
