# Supplementary material for: Droplet distribution in cotton canopy using single-rotor and four-rotor unmanned aerial vehicles
Source: PeerJ. 2022 Jun 14;10:e13572. doi: 10.7717/peerj.13572 (PMC9205310; doi:10.7717/peerj.13572)
Supplement: Supplemental Information 2 [file peerj-10-13572-s002.xls]

## Sheet: Data of all leaves
	Four-rotor	West	P1	P2	P3	P4	P5	P6	P7	P8	P9	P10	P11	North
L1	Head forward		0	0.004	0.05	0.002	0.026	0.35	1.134	0.019	0.006	0.003	0
L2	1m	T7	0.002	0	0.06	0.035	0.125	0.163	0.471	0.017	0.003	0	0
L3			0	0.006	0.078	0.003	0.085	0.055	1.794	0.008	0.004	0	0
L4			0	0.005	0.005	0.008	0.016	0.296	0.813	0.013	0	0	0
L5			0.002	0	0.006	0.039	0.045	0.291	0.442	0.059	0	0	0
L6			0.003	0.002	0.003	0.165	0.01	0.046	0.738	0.014	0.002	0	0
L7			0	0.003	0.009	0.007	0.03	0.025	0.789	0.062	0.006	0	0
L8			0	0.004	0.074	0.007	0.033	0.251	0.53	0.012	0.004	0	0
L9			0	0.002	0.03	0.04	0.198	0.097	0.117	0.014	0	0	0
L10			0.002	0.002	0.008	0.009	0.015	0.119	0.123	0.003	0	0	0
L11			0	0	0.028	0.056	0.021	0.06	0.104	0.003	0	0	0
L12			0.003	0.003	0.003	0.002	0.038	0.118	1.762	0.023	0	0.002	0
L13			0	0.006	0.039	0.006	0.245	0.123	0.072	0.598	0.003	0	0
L14			0	0.003	0.003	0.003	0.048	0.081	0.022	0.304	0	0	0
L15			0.003	0.006	0.015	0.002	0.098	0.002	0.078	0.002	0	0	0
L16			0	0	0.034	0.003	0.134	0.063	0.429	0.016	0	0	0
L17			0	0	0.036	0.009	0.023	0.22	0.154	0.501	0	0	0
L18			0	0	0.078	0	0.008	0.234	0.163	0.051	0.002	0	0
L19			0	0.018	0.03	0.171	0.004	0.084	1.035	0.033	0	0	0
L20			0	0.002	0.037	0.004	0.003	0.207	0.043	0.009	0	0	0
L21			0.002	0.005	0.007	0.007	0.002	0.228	0.101	0.031	0	0	0
L22			0.003	0	0.037	0.2	0.006	0.003	0.053	0.018	0.008	0	0
L23			0.004	0	0.021	0.007	0.03	0.025	0.089	0.007	0	0	0
L24			0.002	0.002	0.023	0.002	0.003	0.045	0.077	0.027	0	0	0
L25			0	0	0.018	0.002	0.002	0.056	0.241	0.004	0.005	0	0
L26			0.003	0.002	0.017	0.002	0.023	0.123	0.05	0.023	0	0	0
L27			0.003	0.002	0.018	0.003	0.023	0.123	0.05	0.023	0	0.001	0
Mean			0.00118519	0.00285185	0.0284074	0.0294074	0.0479259	0.129185	0.424963	0.0701481	0.00159259	0.000222222	0
	Four-rotor		P1	P2	P3	P4	P5	P6	P7	P8	P9	P10	P11
L1	Head forward		0	0.002	0.094	0.095	0.312	0.866	0.092	0.099	0.018	0.008	0.026
L2	2m	T8	0.001	0.002	0.082	0.158	1.474	0.227	0.256	0.059	0	0	0
L3			0	0.002	0.024	0.039	0.966	0.946	0.045	0.021	0	0.011	0.003
L4			0	0	0.086	0	0.24	0.136	0.047	0.038	0.003	0	0
L5			0	0.001	0.018	0.091	0.389	1.474	0.008	0.009	0	0.005	0
L6			0	0	0.004	0.04	0.973	0.934	0.101	0.035	0.006	0	0
L7			0.001	0.004	0.005	0.034	0.036	1.136	0.169	0.007	0.015	0.003	0
L8			0	0.001	0	0.074	0.791	1.011	0.031	0.031	0	0	0
L9			0	0.003	0.034	0.014	0.52	0.757	0.101	0.029	0	0.001	0
L10			0.002	0.004	0	0.01	0.135	0.363	0.042	0.009	0	0	0
L11			0	0	0.014	0.1	0.489	0.243	0.151	0.005	0	0	0
L12			0	0	0.005	0.046	0.642	0.294	0.226	0	0	0	0
L13			0	0.012	0.005	0.015	0.126	0.198	0.02	0.004	0.003	0	0
L14			0	0.004	0.004	0.238	0.276	0.356	0.005	0.021	0	0	0
L15			0	0.003	0.033	0.17	0.759	0	0.004	0.025	0.011	0	0
L16			0	0.002	0.004	0.01	0.04	0.007	0	0.031	0	0	0
L17			0.001	0	0.003	0.083	0.493	0.099	0.798	0.002	0	0	0
L18			0	0.001	0.06	0.003	0.008	0.11	0.127	0.026	0	0	0
L19			0.001	0.001	0.027	0.178	0.318	0.559	0.183	0.023	0.005	0	0
L20			0.001	0.009	0	0.062	0.264	0.16	0.062	0.036	0	0	0
L21			0.002	0.002	0.003	0.021	0.312	0.214	0.046	0	0	0	0
L22			0.001	0	0.031	0.016	0.739	0.039	0.505	0.032	0	0	0
L23			0	0	0.02	0.092	0.051	0.157	0	0	0	0	0
L24			0.001	0	0.001	0.007	0.009	0	0	0.027	0.013	0	0
L25			0	0	0.002	0.019	0.226	0.326	0.168	0.021	0	0	0
L26			0.001	0	0	0.07	0	0.474	0	0	0	0	0
L27			0	0	0	0	0	0	0	0	0	0	0
Mean			0.000444444	0.00196296	0.0207037	0.0624074	0.392148	0.410593	0.118037	0.0218519	0.00274074	0.00107692	0.00107407
	Four-rotor		P1	P2	P3	P4	P5	P6	P7	P8	P9	P10	P11
L1	Head forward		0	0.004	0.11	0.097	0.026	0.254	0.773	0.069	0.006	0.032	0
L2	3m	T9	0	0.005	0.103	0.057	0.014	0.34	0.09	0.031	0.029	0.001	0
L3			0	0.011	0.004	0.057	0.061	0.308	1.239	0.236	0.015	0.01	0
L4			0	0.005	0.106	0.061	0.008	0.233	1.199	0.02	0.015	0.025	0
L5			0	0.003	0.014	0.017	0.008	0.317	0.376	0	0.006	0.006	0
L6			0	0.001	0.042	0.012	0.056	0.11	0.162	0.031	0.018	0.002	0
L7			0	0.001	0.018	0.027	0.007	0.121	0.192	0.128	0.023	0.007	0
L8			0	0.001	0.027	0.014	0.016	0.006	0.464	0.031	0.032	0.027	0
L9			0	0.003	0.077	0.074	0.047	0.24	0.404	0.002	0.005	0.009	0
L10			0	0.015	0.013	0.002	0.059	0.239	0.376	0.166	0.004	0.021	0
L11			0	0	0.009	0.004	0.006	0.181	0.346	0	0.008	0.008	0
L12			0	0	0.012	0.035	0.007	0.099	0.492	0.015	0.02	0.009	0
L13			0	0	0.015	0.044	0.003	0.065	0.382	0.018	0.011	0.008	0
L14			0	0	0.097	0.019	0.003	0.054	0.071	0.131	0.003	0.003	0
L15			0	0.005	0.021	0.051	0.028	0.157	0.027	0.169	0.011	0	0
L16			0	0.001	0.003	0.005	0.09	0.025	0.079	0	0.001	0.005	0
L17			0	0	0.007	0.009	0	0.278	0	0.012	0.002	0.017	0
L18			0	0.001	0.003	0.007	0.015	0.074	0.119	0.085	0.006	0.015	0
L19			0	0.001	0.025	0.011	0.009	0.035	0.168	0.002	0.002	0.016	0
L20			0	0.001	0.004	0.002	0.038	0.044	0.377	0.039	0.048	0.021	0
L21			0	0.004	0.001	0.023	0.04	0.054	0	0.005	0.006	0.003	0
L22			0	0.006	0.015	0.027	0.031	0.077	0.14	0.001	0.007	0.003	0
L23			0	0.003	0.001	0.003	0.075	0.093	0.01	0.002	0.043	0.002	0
L24			0	0	0.002	0.026	0.094	0.039	0	0.038	0.002	0.007	0
L25			0	0	0.002	0.007	0.106	0.063	0.176	0.003	0.001	0.017	0
L26			0	0.009	0.004	0.007	0.019	0.132	0	0.013	0.005	0.004	0
L27			0	0	0.002	0.021	0.01	0.004	0.158	0	0.006	0.007	0
Mean			0	0.00296296	0.0272963	0.0266296	0.0324444	0.134889	0.28963	0.0461852	0.0124074	0.0105556	0
	Four-rotor		P1	P2	P3	P4	P5	P6	P7	P8	P9	P10	P11
L1	Tail forward		0.003	0.104	0.076	0.104	0.227	0.377	0.266	0.161	0.022	0.032	0.01
L2	1m	T10	0.002	0.01	0.1	0.215	0.054	0.054	0.152	0.172	0.001	0.001	0
L3			0	0.063	0.076	0.163	0.194	0.175	0.066	0.068	0.01	0.01	0
L4			0.002	0.048	0.069	0.003	0.079	0.204	0.274	0.005	0.005	0	0
L5			0.001	0.063	0.012	0	0.224	0.219	0.044	0.044	0	0.006	0
L6			0.002	0.01	0.058	0.099	0	0.25	0.05	0.015	0.002	0.002	0
L7			0.002	0.01	0.014	0.04	0.007	0.26	0.174	0.05	0.007	0.007	0
L8			0.001	0.035	0.009	0.134	0.2	0.138	0.202	0.027	0.027	0	0
L9			0	0.035	0.033	0.214	0.198	0.07	0.297	0.155	0.009	0.009	0.003
L10			0.001	0.058	0.086	0.166	0.233	0.174	0.173	0.01	0.021	0.021	0
L11			0.002	0.002	0.004	0.019	0.054	0.133	0.006	0.049	0.008	0.008	0
L12			0	0.007	0.036	0.14	0.363	0.152	0.023	0.168	0.009	0.009	0
L13			0.001	0.036	0.006	0.036	0.065	0	0.154	0.129	0.008	0.008	0
L14			0.004	0.009	0.065	0.013	0.275	0.249	0.277	0.01	0.003	0.003	0
L15			0.002	0.015	0.07	0.011	0.243	0.138	0.101	0.122	0	0	0
L16			0	0.01	0.107	0.019	0.086	0.004	0.02	0.13	0.005	0.005	0
L17			0.002	0.051	0.018	0.139	0.077	0.024	0.054	0.023	0	0.017	0
L18			0	0.018	0.003	0.018	0.095	0.025	0.002	0.008	0.015	0.015	0
L19			0	0.029	0.024	0.069	0.105	0.002	0.138	0.007	0.016	0	0
L20			0.001	0.015	0.023	0.354	0.012	0.071	0.035	0.021	0.021	0.021	0.01
L21			0.002	0.016	0.008	0.009	0.002	0.028	0.004	0.043	0	0.003	0
L22			0.001	0.001	0.014	0.001	0.02	0	0.101	0.041	0.003	0.003	0
L23			0	0.002	0.025	0.02	0.099	0.216	0.009	0.007	0.002	0.002	0
L24			0	0.026	0.019	0.012	0.003	0.023	0.005	0.009	0.007	0.007	0
L25			0.002	0.014	0.023	0.03	0.055	0.026	0.015	0.005	0	0.007	0
L26			0	0.004	0.033	0.137	0.053	0.001	0.018	0.008	0.004	0.004	0
L27			0.002	0.017	0.003	0.233	0.087	0.211	0.097	0.131	0	0.007	0
Mean			0.00122222	0.0262222	0.0375556	0.0888148	0.115185	0.119407	0.102111	0.0599259	0.00703846	0.00766667	0.000851852
	Four-rotor		P1	P2	P3	P4	P5	P6	P7	P8	P9	P10	P11
L1	Tail forward		0.002	0.003	0.096	0.072	0.017	0.038	0.182	0.308	0.005	0.004	0.026
L2	2m	T11	0.001	0.002	0.028	0.043	0.102	0.161	0.141	0.024	0.003	0.021	0.006
L3			0	0.002	0.027	0.074	0.117	0.257	0.089	0.08	0.002	0.019	0.011
L4			0	0.002	0.036	0.035	0.159	0.05	0.112	0.047	0.003	0.031	0.018
L5			0.001	0.001	0.092	0.12	0.026	0.202	0.067	0.038	0	0.014	0.021
L6			0.001	0.002	0.011	0.082	0.002	0.383	0	0.302	0	0.028	0.005
L7			0.001	0.002	0.013	0.087	0.004	0.066	0.231	0.252	0.005	0.012	0
L8			0.001	0.001	0.069	0.062	0.001	0.038	0.115	0.032	0.001	0.016	0.007
L9			0	0.002	0.031	0.016	0.108	0.199	0.086	0.008	0.001	0.002	0
L10			0	0.001	0.05	0.049	0.125	0.312	0.05	0.032	0.001	0.002	0
L11			0	0.002	0.1	0.032	0.014	0.061	0.165	0.01	0	0.027	0.002
L12			0.001	0	0.013	0.029	0.038	0.045	0.235	0.045	0.001	0.013	0.007
L13			0	0.001	0.042	0.066	0.014	0.022	0	0.013	0	0.039	0.014
L14			0.001	0.004	0.13	0.014	0.084	0.013	0.07	0.187	0.002	0.034	0
L15			0.001	0.002	0.003	0.047	0	0.088	0.064	0.158	0.004	0.032	0.011
L16			0.001	0	0.021	0.009	0.105	0.009	0.101	0.048	0.002	0.02	0.001
L17			0	0.002	0.014	0.048	0.006	0.198	0.057	0.03	0	0.006	0.003
L18			0	0	0.023	0.025	0.019	0.049	0.056	0.018	0	0.02	0.003
L19			0.001	0	0.025	0.007	0.023	0	0.061	0	0.002	0.016	0.024
L20			0.001	0.001	0	0.036	0.051	0.12	0	0.109	0.001	0.004	0.008
L21			0	0.002	0	0.004	0.033	0.019	0.005	0.003	0.002	0.022	0.008
L22			0	0.001	0.032	0.001	0.002	0.054	0.059	0.004	0.007	0.025	0.002
L23			0	0	0.008	0.036	0.064	0.001	0.014	0.03	0	0.004	0.004
L24			0.001	0	0.009	0.005	0.027	0.004	0.021	0.033	0.001	0.02	0.003
L25			0	0.002	0.012	0	0.062	0.031	0.002	0.004	0	0.003	0.01
L26			0	0	0.011	0	0.056	0.206	0.092	0.017	0.018	0.022	0.015
L27			0	0.002	0.005	0.002	0.046	0.011	0.01	0.053	0.003	0.017	0.006
Mean			0.000518519	0.00137037	0.0333704	0.0370741	0.0483333	0.0976667	0.0772222	0.0698148	0.00237037	0.0175185	0.00796296
	Four-rotor		P1	P2	P3	P4	P5	P6	P7	P8	P9	P10	P11
L1	Tail forward		0	0.015	0.04	0.048	0.42	0.541	0.11	0.102	0.07	0.01	0.005
L2	3m	T12	0	0.024	0.007	0.227	0.083	0.211	0.123	0.007	0.017	0.038	0
L3			0.001	0.021	0.027	0.064	0.385	0.347	0.028	0.006	0.014	0.029	0.025
L4			0.001	0.016	0.079	0.018	0.417	0.078	0.152	0.034	0	0.009	0.012
L5			0	0.008	0.004	0.023	0.002	0.127	0.078	0.023	0.012	0.02	0
L6			0.002	0	0.012	0.045	0.004	0.316	0.113	0.054	0.011	0.014	0.003
L7			0.003	0.012	0.017	0.153	0.01	0.184	0.058	0.034	0.025	0.024	0.003
L8			0	0.011	0.008	0.162	0.043	0.345	0.047	0.067	0.014	0.003	0.007
L9			0.001	0	0.027	0.002	0.373	0.126	0.021	0.004	0.012	0.021	0.006
L10			0.003	0.005	0.019	0.032	0.341	0.213	0.042	0.021	0.001	0.002	0.009
L11			0	0.024	0	0.126	0.057	0.091	0.012	0.025	0.006	0.022	0.006
L12			0	0.007	0.006	0.092	0.164	0.018	0.032	0.03	0.02	0.029	0.003
L13			0	0	0.01	0.01	0.132	0.055	0.137	0.001	0.053	0.048	0.004
L14			0	0.025	0.015	0.016	0.108	0.157	0.016	0.044	0.01	0.038	0
L15			0	0.009	0.006	0.085	0.005	0.011	0.017	0.032	0.003	0.045	0
L16			0	0.003	0.034	0.002	0.073	0.027	0.028	0	0.003	0.027	0
L17			0.004	0.005	0.007	0.001	0.002	0.003	0.087	0.008	0.001	0.016	0.01
L18			0.001	0.012	0.004	0.009	0.099	0.019	0.114	0.014	0.003	0.002	0.002
L19			0.002	0.002	0.042	0.104	0.086	0.127	0.05	0.009	0.001	0.001	0.011
L20			0.001	0.004	0.007	0.107	0.161	0.068	0	0.016	0	0.001	0.006
L21			0	0.016	0.004	0.009	0.023	0.133	0.002	0.006	0.024	0.011	0
L22			0	0.003	0.02	0.002	0.009	0.004	0.136	0	0.002	0.02	0
L23			0	0	0.013	0.082	0.182	0.022	0	0.014	0.002	0	0.003
L24			0	0.003	0.002	0.004	0.004	0	0.017	0.026	0.004	0.026	0.01
L25			0	0.006	0.004	0.018	0.226	0.005	0	0.005	0.015	0.004	0.001
L26			0	0.011	0.006	0.046	0.011	0.025	0.044	0.009	0.001	0.013	0.002
L27			0	0	0	0	0	0	0	0	0.044	0.005	0.001
Mean			0.000703704	0.00896296	0.0155556	0.0550741	0.126667	0.120481	0.0542222	0.0218889	0.0136296	0.0177037	0.00477778

## Sheet: Summary of Treatments
Treatments	UAV	Flight height (m)	Forward mode
T1	Single-rotor	1	Head forward
T 2	Single-rotor	2	Head forward
T 3	Single-rotor	3	Head forward
T 4	Single-rotor	1	Tail forward
T 5	Single-rotor	2	Tail forward
T 6	Single-rotor	3	Tail forward
T 7	Four-rotor	1	Head forward
T 8	Four-rotor	2	Head forward
T 9	Four-rotor	3	Head forward
T 10	Four-rotor	1	Tail forward
T 11	Four-rotor	2	Tail forward
T 12	Four-rotor	3	Tail forward

## Sheet: Leaves divided into three layer
	Four-rotor	T7	West	P1	P2	P3	P4	P5	P6	P7	P8	P9	P10	P11	North
L1	Head forward			0	0.004	0.05	0.002	0.026	0.35	0.434	0.319	0.006	0.003	0
L2	1m			0.002	0	0.06	0.035	0.125	0.163	0.471	0.317	0.003	0	0
L3				0	0.006	0.078	0.003	0.085	0.055	0.394	0.008	0.004	0	0
L4				0	0.005	0.005	0.008	0.016	0.296	0.813	0.213	0	0	0
L5				0.002	0	0.006	0.039	0.045	0.291	0.442	0.059	0	0	0
L6				0.003	0.002	0.003	0.165	0.01	0.046	0.738	0.114	0.002	0	0
L7				0	0.003	0.009	0.007	0.03	0.025	0.489	0.162	0.006	0	0
L8				0	0.004	0.074	0.007	0.033	0.251	0.53	0.012	0.004	0	0
L9				0	0.002	0.03	0.04	0.198	0.097	0.117	0.014	0	0	0
Mean				0.000777778	0.00288889	0.035	0.034	0.0631111	0.174889	0.492	0.135333	0.00277778	0.000333333	0
SD				0.00120185	0.00208833	0.030996	0.0516503	0.0625029	0.124633	0.200482	0.125453	0.00243812	0.001	0
SE				0.000400617	0.000696109	0.010332	0.0172168	0.0208343	0.0415443	0.0668273	0.0418177	0.000812708	0.000333333	0
L10				0.002	0.002	0.008	0.009	0.015	0.119	0.123	0.003	0	0	0
L11				0	0	0.028	0.056	0.021	0.06	0.104	0.003	0	0	0
L12				0.003	0.003	0.003	0.002	0.038	0.118	0.762	0.023	0	0.002	0
L13				0	0.006	0.039	0.006	0.245	0.123	0.072	0.598	0.003	0	0
L14				0	0.003	0.003	0.003	0.048	0.081	0.022	0.304	0	0	0
L15				0.003	0.006	0.015	0.002	0.098	0.002	0.078	0.002	0	0	0
L16				0	0	0.034	0.003	0.134	0.063	0.429	0.016	0	0	0
L17				0	0	0.036	0.009	0.023	0.22	0.154	0.501	0	0	0
L18				0	0	0.078	0	0.008	0.234	0.163	0.051	0.002	0	0
Mean				0.000888889	0.00222222	0.0271111	0.01	0.07	0.113333	0.211889	0.166778	0.000555556	0	0
SD				0.00136423	0.00248886	0.0238036	0.0175357	0.0778556	0.07492	0.2368	0.238248	0.00113039	0	0
SE				0.000454742	0.000829621	0.00793453	0.00584523	0.0259519	0.0249733	0.0789334	0.0794159	0.000376796	0	0
L19				0	0.018	0.03	0.171	0.004	0.084	0.035	0.033	0	0	0
L20				0	0.002	0.037	0.004	0.003	0.207	0.043	0.009	0	0	0
L21				0.002	0.005	0.007	0.007	0.002	0.228	0.101	0.031	0	0	0
L22				0.003	0	0.037	0.2	0.006	0.003	0.053	0.018	0.008	0	0
L23				0.004	0	0.021	0.007	0.03	0.025	0.089	0.007	0	0	0
L24				0.002	0.002	0.023	0.002	0.003	0.045	0.077	0.027	0	0	0
L25				0	0	0.018	0.002	0.002	0.056	0.241	0.004	0.005	0	0
L26				0.003	0.002	0.017	0.002	0.023	0.123	0.05	0.023	0	0	0
L27				0.003	0.002	0.018	0.003	0.023	0.123	0.05	0.023	0	0.001	0
Mean				0.00188889	0.00344444	0.0231111	0.0442222	0.0106667	0.0993333	0.0821111	0.0194444	0.00144444	0	0
SD				0.00153659	0.00568135	0.00991772	0.0804484	0.0112472	0.0783725	0.0635756	0.0106315	0.00296273	0.000333333	0
SE				0.000512197	0.00189378	0.00330591	0.0268161	0.00374907	0.0261242	0.0211919	0.00354382	0.000987577	0.000111111	0
	Four-rotor	T8		P1	P2	P3	P4	P5	P6	P7	P8	P9	P10	P11
L1	Head forward			0	0.002	0.094	0.395	0.312	0.866	0.492	0.299	0.018	0.008	0.026
L2	2m			0.001	0.002	0.082	0.158	1.474	0.227	0.256	0.059	0	0	0
L3				0	0.002	0.024	0.039	0.966	0.946	0.045	0.021	0	0.011	0.003
L4				0	0	0.086	0	0.24	0.136	0.047	0.038	0.003	0	0
L5				0	0.001	0.018	0.091	0.389	1.474	0.008	0.009	0	0.005	0
L6				0	0	0.004	0.04	0.973	0.934	0.101	0.035	0.006	0	0
L7				0.001	0.004	0.005	0.034	0.036	1.136	0.169	0.007	0.015	0.003	0
L8				0	0.001	0	0.074	0.791	1.011	0.031	0.031	0	0	0
L9				0	0.003	0.034	0.014	0.52	0.757	0.101	0.029	0	0.001	0
Mean				0.000222222	0.00166667	0.0385556	0.0938889	0.633444	0.831889	0.138889	0.0586667	0	0.00311111	0.00322222
SD				0.000440959	0.00132288	0.0382005	0.122415	0.45345	0.420898	0.153383	0.0914795	0.00705337	0.00407567	0.0085991
SE				0.1	0.1	0.0127335	0.0408049	0.15115	0.140299	0.0511277	0.0304932	0.00235112	0.00135856	0.00286637
L10				0	0	0.014	0.1	0.489	0.243	0.151	0.005	0	0	0
L11				0	0	0.005	0.046	0.642	0.294	0.226	0	0	0	0
L12				0	0.012	0.005	0.015	0.126	0.198	0.02	0.004	0.003	0	0
L13				0	0.004	0.004	0.238	0.276	0.356	0.005	0.021	0	0	0
L14				0	0.003	0.033	0.17	0.759	0.212	0.004	0.025	0.011	0	0
L15				0	0.002	0.004	0.01	0.04	0.007	0.003	0.031	0	0	0
L16				0.001	0	0.003	0.083	0.493	0.099	0.798	0.002	0	0	0
L17				0	0.001	0.06	0.003	0.008	0.11	0.127	0.026	0	0	0
L18				0.001	0.001	0.027	0.178	0.318	0.559	0.183	0.023	0.005	0	0
Mean				0.000222222	0.00255556	0.0172222	0.0936667	0.350111	0.230889	0.168556	0.0152222	0.00211111	0	0
SD				0.000440959	0.00381153	0.0194793	0.0848572	0.26506	0.162409	0.251259	0.0122043	0.00378961	0	0
SE				0.000146986	0.00127051	0.00649311	0.0282857	0.0883534	0.0541363	0.0837531	0.00406809	0.0012632	0	0
L19				0.001	0.009	0	0.062	0.264	0.16	0.062	0.036	0	0	0
L20				0.002	0.002	0.003	0.021	0.312	0.214	0.046	0	0	0	0
L21				0.001	0	0.031	0.016	0.739	0.039	0.505	0.032	0	0	0
L22				0	0	0.02	0.092	0.051	0.157	0.121	0	0	0	0
L23				0.001	0	0.001	0.007	0.009	0.11	0	0.027	0.013	0	0
L24				0	0	0.002	0.019	0.226	0.326	0.168	0.021	0	0	0
L25				0.001	0	0	0.07	0	0.474	0	0	0	0	0
L26				0	0	0	0	0	0	0	0	0	0	0
L27				0	0	0	0	0	0	0	0	0	0	0
Mean				0.000666667	0.00122222	0.00633333	0.0318889	0.177889	0.164444	0.100222	0.0128889	0.00144444	0	0
SD				0.000707107	0.00299073	0.0112583	0.0338432	0.245489	0.157019	0.163344	0.0157912	0.00433333	0	0
SE				0.000235702	0.000996909	0.00375278	0.0112811	0.0818297	0.0523397	0.0544479	0.00526372	0.00144444	0	0
	Four-rotor	T9		P1	P2	P3	P4	P5	P6	P7	P8	P9	P10	P11
L1	Head forward			0	0.004	0.11	0.097	0.026	0.254	0.773	0.069	0.006	0.032	0
L2	3m			0	0.005	0.103	0.057	0.014	0.34	0.09	0.031	0.029	0.001	0
L3				0	0.011	0.004	0.057	0.061	0.308	1.239	0.236	0.015	0.01	0
L4				0	0.005	0.106	0.061	0.008	0.233	1.199	0.02	0.015	0.025	0
L5				0	0.003	0.014	0.017	0.008	0.317	0.376	0	0.006	0.006	0
L6				0	0.001	0.042	0.012	0.056	0.11	0.162	0.031	0.018	0.002	0
L7				0	0.001	0.018	0.027	0.007	0.121	0.192	0.128	0.023	0.007	0
L8				0	0.001	0.027	0.014	0.016	0.006	0.464	0.031	0.032	0.027	0
L9				0	0.003	0.077	0.074	0.047	0.24	0.404	0.002	0.005	0.009	0
Mean				0	0.00377778	0.0556667	0.0462222	0.027	0.214333	0.544333	0.0608889	0.0165556	0.0132222	0
SD				0	0.00315348	0.0433215	0.0300698	0.0218232	0.112186	0.432241	0.0764533	0.00998888	0.011595	0
SE				0	0.00105116	0.0144405	0.0100233	0.00727438	0.0373954	0.14408	0.0254844	0.00332963	0.00386501	0
L10				0	0.015	0.013	0.002	0.059	0.239	0.376	0.166	0.004	0.021	0
L11				0	0	0.009	0.004	0.006	0.181	0.346	0	0.008	0.008	0
L12				0	0	0.012	0.035	0.007	0.099	0.492	0.015	0.02	0.009	0
L13				0	0	0.015	0.044	0.003	0.065	0.382	0.018	0.011	0.008	0
L14				0	0	0.097	0.019	0.003	0.054	0.071	0.131	0.003	0.003	0
L15				0	0.005	0.021	0.051	0.028	0.157	0.027	0.169	0.011	0	0
L16				0	0.001	0.003	0.005	0.09	0.025	0.079	0	0.001	0.005	0
L17				0	0	0.007	0.009	0	0.278	0	0.012	0.002	0.017	0
L18				0	0.001	0.003	0.007	0.015	0.074	0.119	0.085	0.006	0.015	0
Mean				0	0.00244444	0.02	0.0195556	0.0234444	0.130222	0.210222	0.0662222	0.00733333	0.00955556	0
SD				0	0.00497773	0.0294449	0.0188952	0.0311172	0.0882026	0.18625	0.0722215	0.006	0.00685768	0
SE				0	0.00165924	0.00981495	0.00629839	0.0103724	0.0294009	0.0620832	0.0240738	0.002	0.00228589	0
L19				0	0.001	0.025	0.011	0.009	0.035	0.168	0.002	0.002	0.016	0
L20				0	0.001	0.004	0.002	0.038	0.044	0.377	0.039	0.048	0.021	0
L21				0	0.004	0.001	0.023	0.04	0.054	0	0.005	0.006	0.003	0
L22				0	0.006	0.015	0.027	0.031	0.077	0.14	0.001	0.007	0.003	0
L23				0	0.003	0.001	0.003	0.075	0.093	0.01	0.002	0.043	0.002	0
L24				0	0	0.002	0.026	0.094	0.039	0	0.038	0.002	0.007	0
L25				0	0	0.002	0.007	0.106	0.063	0.176	0.003	0.001	0.017	0
L26				0	0.009	0.004	0.007	0.019	0.132	0	0.013	0.005	0.004	0
L27				0	0	0.002	0.021	0.01	0.004	0.158	0	0.006	0.007	0
Mean				0	0.00266667	0.00622222	0.0141111	0.0468889	0.0601111	0.114333	0.0114444	0.0133333	0.00888889	0
SD				0	0.00316228	0.00827312	0.0100926	0.036154	0.0371902	0.126661	0.0158044	0.0183984	0.00716667	0
SE				0	0.00105409	0.00275771	0.00336421	0.0120513	0.0123967	0.0422203	0.00526812	0.00613279	0.00238889	0
	Four-rotor	T10		P1	P2	P3	P4	P5	P6	P7	P8	P9	P10	P11
L1	Tail forward			0.003	0.104	0.076	0.104	0.227	0.377	0.266	0.161	0.022	0.032	0.01
L2	1m			0.002	0.01	0.1	0.215	0.054	0.054	0.152	0.172	0.001	0.001	0
L3				0	0.063	0.076	0.163	0.194	0.175	0.066	0.068	0.01	0.01	0
L4				0.002	0.048	0.069	0.003	0.079	0.204	0.274	0.005	0.005	0	0
L5				0.001	0.063	0.012	0	0.224	0.219	0.044	0.044	0	0.006	0
L6				0.002	0.01	0.058	0.099	0	0.25	0.05	0.015	0.002	0.002	0
L7				0.002	0.01	0.014	0.04	0.007	0.26	0.174	0.05	0.007	0.007	0
L8				0.001	0.035	0.009	0.134	0.2	0.138	0.202	0.027	0.027	0	0
L9				0	0.035	0.033	0.214	0.198	0.07	0.297	0.155	0.009	0.009	0.003
Mean				0.00144444	0.042	0.0496667	0.108	0.131444	0.194111	0.169444	0.0774444	0.00922222	0.00744444	0.00144444
SD				0.00101379	0.0314881	0.0335149	0.082003	0.0950344	0.100112	0.0991301	0.0666992	0.00940449	0.00997636	0.00335824
SE				0.000337931	0.010496	0.0111716	0.0273343	0.0316781	0.0333706	0.0330434	0.0222331	0.00313483	0.00332545	0.00111941
L10				0.001	0.058	0.086	0.166	0.233	0.174	0.173	0.01	0.021	0.021	0
L11				0.002	0.002	0.004	0.019	0.054	0.133	0.006	0.049	0.008	0.008	0
L12				0	0.007	0.036	0.14	0.363	0.152	0.023	0.168	0.009	0.009	0
L13				0.001	0.036	0.006	0.036	0.065	0	0.154	0.129	0.008	0.008	0
L14				0.004	0.009	0.065	0.013	0.275	0.249	0.277	0.01	0.003	0.003	0
L15				0.002	0.015	0.07	0.011	0.243	0.138	0.101	0.122	0	0	0
L16				0	0.01	0.107	0.019	0.086	0.004	0.02	0.13	0.005	0.005	0
L17				0.002	0.051	0.018	0.139	0.077	0.024	0.054	0.023	0	0.017	0
L18				0	0.018	0.003	0.018	0.095	0.025	0.002	0.008	0.015	0.015	0
Mean				0.00133333	0.0228889	0.0438889	0.0623333	0.165667	0.0998889	0.09	0.0721111	0.00766667	0.00955556	0
SD				0.00132288	0.0203988	0.0392347	0.0653261	0.113586	0.0891143	0.094578	0.0642679	0.00689202	0.00685768	0
SE				0.000440959	0.0067996	0.0130782	0.0217754	0.037862	0.0297048	0.031526	0.0214226	0.00229734	0.00228589	0
L19				0	0.029	0.024	0.069	0.105	0.002	0.138	0.007	0.016	0	0
L20				0.001	0.015	0.023	0.354	0.012	0.071	0.035	0.021	0.021	0.021	0.01
L21				0.002	0.016	0.008	0.009	0.002	0.028	0.004	0.043	0	0.003	0
L22				0.001	0.001	0.014	0.001	0.02	0	0.101	0.041	0.003	0.003	0
L23				0	0.002	0.025	0.02	0.099	0.216	0.009	0.007	0.002	0.002	0
L24				0	0.026	0.019	0.012	0.003	0.023	0.005	0.009	0.007	0.007	0
L25				0.002	0.014	0.023	0.03	0.055	0.026	0.015	0.005	0	0.007	0
L26				0	0.004	0.033	0.137	0.053	0.001	0.018	0.008	0.004	0.004	0
L27				0.002	0.017	0.003	0.233	0.087	0.211	0.097	0.131	0	0.007	0
Mean				0.000888889	0.0137778	0.0191111	0.0961111	0.0484444	0.0642222	0.0468889	0.0302222	0.00588889	0.006	0.00111111
SD				0.000927961	0.00997218	0.00929307	0.12325	0.0413283	0.0873868	0.0509447	0.0405887	0.00760665	0.0061441	0.00333333
SE				0.00030932	0.00332406	0.00309769	0.0410834	0.0137761	0.0291289	0.0169816	0.0135296	0.00253555	0.00204803	0.00111111
	Four-rotor	T11		P1	P2	P3	P4	P5	P6	P7	P8	P9	P10	P11
L1	Tail forward			0.002	0.003	0.096	0.072	0.017	0.038	0.182	0.308	0.005	0.004	0.026
L2	2m			0.001	0.002	0.028	0.043	0.102	0.161	0.141	0.024	0.003	0.021	0.006
L3				0	0.002	0.027	0.074	0.117	0.257	0.089	0.08	0.002	0.019	0.011
L4				0	0.002	0.036	0.035	0.159	0.05	0.112	0.047	0.003	0.031	0.018
L5				0.001	0.001	0.092	0.12	0.026	0.202	0.067	0.038	0	0.014	0.021
L6				0.001	0.002	0.011	0.082	0.002	0.383	0	0.302	0	0.028	0.005
L7				0.001	0.002	0.013	0.087	0.004	0.066	0.231	0.252	0.005	0.012	0
L8				0.001	0.001	0.069	0.062	0.001	0.038	0.115	0.032	0.001	0.016	0.007
L9				0	0.002	0.031	0.016	0.108	0.199	0.086	0.008	0.001	0.002	0
Mean				0.000777778	0.00188889	0.0447778	0.0656667	0.0595556	0.154889	0.113667	0.121222	0.00222222	0.0163333	0.0104444
SD				0.000666667	0.000600925	0.0325107	0.0310604	0.0613415	0.118792	0.0667645	0.127002	0.00192209	0.00975961	0.00928858
SE				0.000222222	0.000200308	0.0108369	0.0103535	0.0204472	0.0395974	0.0222548	0.0423339	0.000640698	0.0032532	0.00309619
L10				0	0.001	0.05	0.049	0.125	0.312	0.05	0.032	0.001	0.002	0
L11				0	0.002	0.1	0.032	0.014	0.061	0.165	0.01	0	0.027	0.002
L12				0.001	0	0.013	0.029	0.038	0.045	0.235	0.045	0.001	0.013	0.007
L13				0	0.001	0.042	0.066	0.014	0.022	0	0.013	0	0.039	0.014
L14				0.001	0.004	0.13	0.014	0.084	0.013	0.07	0.187	0.002	0.034	0
L15				0.001	0.002	0.003	0.047	0	0.088	0.064	0.158	0.004	0.032	0.011
L16				0.001	0	0.021	0.009	0.105	0.009	0.101	0.048	0.002	0.02	0.001
L17				0	0.002	0.014	0.048	0.006	0.198	0.057	0.03	0	0.006	0.003
L18				0	0	0.023	0.025	0.019	0.049	0.056	0.018	0	0.02	0.003
Mean				0.000444444	0.00133333	0.044	0.0354444	0.045	0.0885556	0.0886667	0.0601111	0.00111111	0.0214444	0.00455556
SD				0.000527046	0.00132288	0.0434223	0.0184737	0.0470558	0.101608	0.0705124	0.0654398	0.00136423	0.0127486	0.0050277
SE				0.000175682	0.000440959	0.0144741	0.0061579	0.0156853	0.0338695	0.0235041	0.0218133	0.000454742	0.00424955	0.0016759
L19				0.001	0	0.025	0.007	0.023	0	0.061	0	0.002	0.016	0.024
L20				0.001	0.001	0	0.036	0.051	0.12	0	0.109	0.001	0.004	0.008
L21				0	0.002	0	0.004	0.033	0.019	0.005	0.003	0.002	0.022	0.008
L22				0	0.001	0.032	0.001	0.002	0.054	0.059	0.004	0.007	0.025	0.002
L23				0	0	0.008	0.036	0.064	0.001	0.014	0.03	0	0.004	0.004
L24				0.001	0	0.009	0.005	0.027	0.004	0.021	0.033	0.001	0.02	0.003
L25				0	0.002	0.012	0	0.062	0.031	0.002	0.004	0	0.003	0.01
L26				0	0	0.011	0	0.056	0.206	0.092	0.017	0.018	0.022	0.015
L27				0	0.002	0.005	0.002	0.046	0.011	0.01	0.053	0.003	0.017	0.006
Mean				0.000333333	0.000888889	0.0113333	0.0101111	0.0404444	0.0495556	0.0293333	0.0281111	0.00377778	0.0147778	0.00888889
SD				0.0005	0.000927961	0.0107703	0.0148614	0.0206828	0.0699198	0.0329545	0.0351726	0.00573973	0.00875754	0.00691817
SE				0.000166667	0.00030932	0.00359011	0.0049538	0.00689426	0.0233066	0.0109848	0.0117242	0.00191324	0.00291918	0.00230606
	Four-rotor	T12		P1	P2	P3	P4	P5	P6	P7	P8	P9	P10	P11
L1	Tail forward			0	0.015	0.04	0.048	0.42	0.541	0.11	0.102	0.07	0.01	0.005
L2	3m			0	0.024	0.007	0.227	0.083	0.211	0.123	0.007	0.017	0.038	0
L3				0.001	0.021	0.027	0.064	0.385	0.347	0.028	0.006	0.014	0.029	0.025
L4				0.001	0.016	0.079	0.018	0.417	0.078	0.152	0.034	0	0.009	0.012
L5				0	0.008	0.004	0.023	0.002	0.127	0.078	0.023	0.012	0.02	0
L6				0.002	0	0.012	0.045	0.004	0.316	0.113	0.054	0.011	0.014	0.003
L7				0.003	0.012	0.017	0.153	0.01	0.184	0.058	0.034	0.025	0.024	0.003
L8				0	0.011	0.008	0.162	0.043	0.345	0.047	0.067	0.014	0.003	0.007
L9				0.001	0	0.027	0.002	0.373	0.126	0.021	0.004	0.012	0.021	0.006
Mean				0.000888889	0.0118889	0.0245556	0.0824444	0.193	0.252778	0.0811111	0.0367778	0.0194444	0.0186667	0.00677778
SD				0.00105409	0.00832833	0.0235431	0.0784938	0.19725	0.147211	0.0457888	0.0327444	0.0200382	0.0109087	0.0077746
SE				0.000351364	0.00277611	0.0078477	0.0261646	0.0657499	0.0490702	0.0152629	0.0109148	0.00667939	0.00363624	0.00259153
L10				0.003	0.005	0.019	0.032	0.341	0.213	0.042	0.021	0.001	0.002	0.009
L11				0	0.024	0	0.126	0.057	0.091	0.012	0.025	0.006	0.022	0.006
L12				0	0.007	0.006	0.092	0.164	0.018	0.032	0.03	0.02	0.029	0.003
L13				0	0	0.01	0.01	0.132	0.055	0.137	0.001	0.053	0.048	0.004
L14				0	0.025	0.015	0.016	0.108	0.157	0.016	0.044	0.01	0.038	0
L15				0	0.009	0.006	0.085	0.005	0.011	0.017	0.032	0.003	0.045	0
L16				0	0.003	0.034	0.002	0.073	0.027	0.028	0	0.003	0.027	0
L17				0.004	0.005	0.007	0.001	0.002	0.003	0.087	0.008	0.001	0.016	0.01
L18				0.001	0.012	0.004	0.009	0.099	0.019	0.114	0.014	0.003	0.002	0.002
Mean				0.000888889	0.01	0.0112222	0.0414444	0.109	0.066	0.0538889	0.0194444	0.0111111	0.0254444	0.00377778
SD				0.00153659	0.00890225	0.0102808	0.0468671	0.102313	0.0738783	0.0467157	0.0149341	0.0168185	0.0168234	0.00383333
SE				0.000512197	0.00296742	0.00342693	0.0156224	0.0341044	0.0246261	0.0155719	0.00497804	0.00560616	0.00560781	0.00127778
L19				0.002	0.002	0.042	0.104	0.086	0.127	0.05	0.009	0.001	0.001	0.011
L20				0.001	0.004	0.007	0.107	0.161	0.068	0	0.016	0	0.001	0.006
L21				0	0.016	0.004	0.009	0.023	0.133	0.002	0.006	0.024	0.011	0
L22				0	0.003	0.02	0.002	0.009	0.004	0.136	0	0.002	0.02	0
L23				0	0	0.013	0.082	0.182	0.022	0	0.014	0.002	0	0.003
L24				0	0.003	0.002	0.004	0.004	0	0.017	0.026	0.004	0.026	0.01
L25				0	0.006	0.004	0.018	0.226	0.005	0	0.005	0.015	0.004	0.001
L26				0	0.011	0.006	0.046	0.011	0.025	0.044	0.009	0.001	0.013	0.002
L27				0	0	0	0	0	0	0	0	0.044	0.005	0.001
Mean				0.000333333	0.005	0.0108889	0.0413333	0.078	0.0426667	0.0276667	0.00944444	0.0103333	0.009	0.00377778
SD				0.000707107	0.00531507	0.0131667	0.0449361	0.0890983	0.0538609	0.0451885	0.00827815	0.0150083	0.00921954	0.00423609
SE				0.000235702	0.00177169	0.00438889	0.0149787	0.0296994	0.0179536	0.0150628	0.00275938	0.00500278	0.00307318	0.00141203
