# Supplementary material for: Droplet distribution in cotton canopy using single-rotor and four-rotor unmanned aerial vehicles
Source: PeerJ. 2022 Jun 14;10:e13572. doi: 10.7717/peerj.13572 (PMC9205310; doi:10.7717/peerj.13572)
Supplement: Supplemental Information 3 [file peerj-10-13572-s003.xls]

## Sheet: T1-12L-1m-Head forward
											µL/cm2
plant number	Cotton canopy	East	Southeast	South	Southwest	West	Northwest	North	Northeast	Mean
											SD	SE	T1
	Upper	0.145	0.045	0	0.23	0.3	0.00666667	0.04	0.01	0.0970833	0.114825	0.0405967
P3	Middle	0.01	0.0067	0	0.165	0.02	0	0.01	0.01	0.0277125	0.0558391	0.0197421	P3
	Bottom	0	0	0.11	0.03	0	0	0.04	0.03	0.02625	0.0377728	0.0133547
		0.0516667	0.0172333	0.0366667	0.141667	0.106667	0.00222222	0.03	0.0166667
	Upper	0	0.005	0.75	0.16	0.19	1.04	0.06	0.06	0.283125	0.171657	0.0606901
P4	Middle	0	0	0.0105	0.15	0.495	0.09	0	0	0.0931875	0.0889553	0.0314504	P4
	Bottom	0	0	0	0.226667	0	0	0.153333	0.0183333	0.0497917	0.0889553	0.0314504
		0	0	0.00525	0.188333	0.2475	0.045	0.0766667	0.00916667
	Upper	0	0	0.03	1.08	0.47	0.63	1.03	0.01	0.40625	0.466872	0.165064
P5	Middle	0.1	0.03	0	0.4	0.02	0.04	0	0	0.07375	0.135956	0.0480676	P5
	Bottom	0.01	0	0.05	0.13	0	0.01	0	0.01	0.02625	0.0450198	0.0159169
		0.0366667	0.01	0.0266667	0.536667	0.163333	0.226667	0.343333	0.00666667
	Upper	0.04	0.205	0.31	1.55	1.81667	0.18	0.21	0.025	0.542083	0.714022	0.252445
P6	Middle	0.025	0.045	0.08	0.07	0	0	0.02	0.23	0.05875	0.0752496	0.0266047	P6
	Bottom	0.055	0	0.01	0.01	0.175	0	0.02	0.075	0.043125	0.0597577	0.0211275
		0.04	0.0833333	0.133333	0.543333	0.663889	0.06	0.0833333	0.11
	Upper	0.945	1.51667	0.4	0.165	0.16	1.12	1.21	0	0.689583	0.575751	0.203559
P7	Middle	1.38	0.47	1.14	0	0	0	0.2825	0	0.409062	0.556269	0.196671	P7
	Bottom	0.74	0	0.09	0	0.015	0.05	0.05	0.03	0.121875	0.251566	0.0889419
		1.02167	0.662222	0.543333	0.055	0.0583333	0.39	0.514167	0.01
	Upper	1.135	0.895	0.18	0.035	0.04	0.143333	0.85	0.55	0.478542	0.437199	0.154573
P8	Middle	0.2066	0.005	0.04667	0.04666	0.015	0.07	0.4133	0.07	0.109154	0.137628	0.0486587	P8
	Bottom	0.08	0.035	0.01	0	0	0.0466667	0	0.485	0.0820833	0.165282	0.0584359
		0.473867	0.311667	0.07889	0.02722	0.0183333	0.0866667	0.4211	0.368333
	Upper	0.2	0.16	0.04	0.12	0.1	0.05	0.07	0.06	0.1	0.0568205	0.0200891
P9	Middle	0.175	0.00333	0.0066	0.02	0.105	0.02	0.02	0.01	0.0449913	0.0618881	0.0218807	P9
	Bottom	0.0833333	0.05	0.01	0.04	0.01	0.0366667	0	0.0333333	0.0329167	0.0268114	0.00947925
		0.152778	0.07111	0.0188667	0.06	0.0716667	0.0355556	0.03	0.0344444

## Sheet: T2-12L-1m-Tail forward
	plant number	Cotton canopy	East	Southeast	South	Southwest	West	Northwest	North	Northeast	Mean
												SD	SE	T2
第一株		Upper	0.05	0.015	0	0.08	0.06	0.025	0.03	0.035	0.036875	0.0256261	0.00906019
	P3	Middle	0.035	0.03	0	0.06	0.08	0.0566667	0.04	0.06	0.0452083	0.0244533	0.00864556	P3
		Bottom	0.02	0.0116667	0.03	0.02	0	0.015	0	0.01	0.0133333	0.010274	0.00363242
			0.035	0.0188889	0.01	0.0533333	0.0466667	0.0322222	0.0233333	0.035
第二株		Upper	0.015	0.05	0.02	0.09	0.2225	0	0.14	0.11	0.0809375	0.0756158	0.0267342
	P4	Middle	0	0.00666667	0.02	0.115	0.11	0.11	0.01	0.02	0.0489583	0.0523642	0.0185136	P4
		Bottom	0	0.04	0.06	0.113333	0	0	0.0366667	0.015	0.033125	0.0393442	0.0139103
			0.005	0.0322222	0.0333333	0.106111	0.110833	0.0366667	0.0622222	0.0483333
第三株		Upper	0	0	0.06	0.38	0.4875	0	0.095	0.035	0.132187	0.191281	0.0676279
	P5	Middle	0	0	0.04	0.73	0.35	0.05	0	0.045	0.151875	0.261041	0.0922919	P5
		Bottom	0.045	0	0.125	0.13	0.27	0.265	0	0.13	0.120625	0.105676	0.0373621
			0.015	0	0.075	0.413333	0.369167	0.105	0.0316667	0.07
第四株		Upper	0.16	0.29	0.47	0.02	0.12	0.06	0.02	0.2575	0.174688	0.156561	0.0553528
	P6	Middle	0.12	0.27	0.15	0.02	2.53056	0	0.31	0.36	0.470069	0.842775	0.297966	P6
		Bottom	0.07	0	0.18	0.015	0.07	0	0.07	0.03	0.054375	0.0592475	0.0209472
			0.116667	0.186667	0.266667	0.0183333	0.906852	0.02	0.133333	0.215833
第五株		Upper	0.39	0.53	0.5	0.05	0.045	0.265	0.28	0	0.2575	0.208977	0.0738846
	P7	Middle	0.02	0.045	0.43	0.13	0	0.34	0.16	0	0.140625	0.163542	0.0578208	P7
		Bottom	0.18	0	0.39	0	0.05	0.01	0.05	0.035	0.089375	0.134654	0.0476074
			0.196667	0.191667	0.44	0.06	0.0316667	0.205	0.163333	0.0116667
第六株		Upper	0.235	0.82	0.323333	0.015	0.01	0.05	0.19	0.365	0.251042	0.2673	0.0945047
	P8	Middle	0.1733	0.31	0.3925	0.12	0.05	0.01	0.5033	0.085	0.205512	0.177217	0.0626558	P8
		Bottom	0.125	0.185	0.0766667	0	0.01	0.04	0	0.0866667	0.0654167	0.0662292	0.0234156
			0.177767	0.438333	0.264167	0.045	0.0233333	0.0333333	0.2311	0.178889
第七株		Upper	0.33	0.26	0.1	0.02	0.01	0.015	0.31	0.21	0.156875	0.136563	0.0482824
	P9	Middle	0.395	0.125	0.04	0.02	0.01	0.01	0.01	0.03	0.08	0.132907	0.0469897	P9
		Bottom	0.106667	0.1	0	0.02	0	0.0666667	0	0.1	0.0491667	0.0491111	0.0173634
			0.277222	0.161667	0.0466667	0.02	0.00666667	0.0305556	0.106667	0.113333

## Sheet: T3-12L-2m-Head forward
plant number	Cotton canopy	East	Southeast	South	Southwest	West	Northwest	North	Northeast	Mean
											SD	SE	T3
	Upper	0.5	0.06	0	0.34	1.12	0.0333333	0.14	0.09	0.285417	0.378099	0.133678
P3	Middle	0	0.04	0	0.18	0.16	0.08	0.08	0	0.0675	0.0716639	0.025337	P3
	Bottom	0.04	0.02	0.46	0.08	0	0.27	0.04	0.04	0.11875	0.161814	0.0572101
		0.18	0.04	0.153333	0.2	0.426667	0.127778	0.0866667	0.0433333
	Upper	0.02	0.24	0.15	0.473333	0.7	0.22	0	0.08	0.235417	0.240825	0.0851445
P4	Middle	0	0.08	0.3	0.6	0.04	0.1	0	0	0.14	0.210849	0.0745462	P4
	Bottom	0	0.0733333	0.0733333	0.32	0.06	0.12	0.12	0.06	0.103333	0.0954189	0.0337357
		0.00666667	0.131111	0.174444	0.464444	0.266667	0.146667	0.04	0.0466667
	Upper	0.15	0	0.0333333	0.42	0.4	0.08	0.5	0.03	0.201667	0.204225	0.0722045
P5	Middle	0	0	0.1	0.1	0.06	0.44	0	0	0.0875	0.14926	0.0527714	P5
	Bottom	0.03	0	0.06	0.206667	0.46	0.11	0	0.3	0.145833	0.165085	0.0583665
		0.06	0	0.0644444	0.242222	0.306667	0.21	0.166667	0.11
	Upper	0.1	0.3	0.24	0.04	0.474	0.12	0.08	0.085	0.179875	0.147871	0.0522803
P6	Middle	0.17	0.24	0.02	0	0.02	0	0.04	0	0.06125	0.0917197	0.0324278	P6
	Bottom	0.08	0	0.02	0.02	0.03	0.12	0.03	0.06	0.045	0.0392792	0.0138873
		0.116667	0.18	0.0933333	0.02	0.174667	0.08	0.05	0.0483333
	Upper	0.76	0.334	0.02	0.07	0.24	0.05	0.106	0	0.1975	0.254598	0.0900141
P7	Middle	0.02	0.12	0.92	0	0	0	0.07	0	0.14125	0.31769	0.11232	P7
	Bottom	0.07	0	0.066	0	0.01	0	0	0.2	0.04325	0.0700933	0.0247817
		0.283333	0.151333	0.335333	0.0233333	0.0833333	0.0166667	0.0586667	0.0666667
	Upper	0.9	1.52	0.72	0.24	0.16	0.19	0.28	0.53	0.5675	0.469186	0.165882
P8	Middle	0.15	0.17	0.266667	0	0	0.02	0.2732	0.02	0.112483	0.117552	0.0415609	P8
	Bottom	0	0.16	0.02	0	0	0.173333	0.04	0.0866667	0.06	0.072067	0.0254795
		0.35	0.616667	0.335556	0.08	0.0533333	0.127778	0.197733	0.212222
	Upper	0.12	0.74	0.14	0.04	0.02	0.04	0.14	0.16	0.175	0.234643	0.0829587
P9	Middle	0.44	0.25	0.0666	0.02	0.04	0.08	0.106667	0.3	0.162908	0.150238	0.0531172	P9
	Bottom	0.0733333	0.28	0.04	0.06	0	0.15	0	0.14	0.0929167	0.0941198	0.0332764
		0.211111	0.423333	0.0822	0.04	0.02	0.09	0.0822222	0.2

## Sheet: T4-12L-2m-Tail forward
plant number	Cotton canopy	East	Southeast	South	Southwest	West	Northwest	North	Northeast	Mean
											SD	SE	T4
	Upper	0.73	0.11	0	0.07	0.385	0.0366667	0.09	0.105	0.190833	0.247056	0.0873474
P3	Middle	0.015	0.03	0	0.39	0.27	0.0928571	0.16	0.53	0.185982	0.194397	0.0687299	P3
	Bottom	0.06	0.05	0.28	0.22	0	0.08	0.25	0	0.1175	0.114237	0.0403887
		0.268333	0.0633333	0.0933333	0.226667	0.218333	0.0698413	0.166667	0.211667
	Upper	0.08	0.025	0.06	0.443	0.66	0	0.02	0.1	0.1735	0.242621	0.0857796
P4	Middle	0.07	0.0966667	0.4	0.335	0.335	0.4	0.06	0.105	0.225208	0.154721	0.054702	P4
	Bottom	0	0.16	0.03	0.135	0.18	0	0.163333	0.05	0.0897917	0.0772773	0.0273216
		0.05	0.0938889	0.163333	0.304333	0.391667	0.133333	0.0811111	0.085
	Upper	0.075	0.37	0.823333	0.8	0.5525	0.1	0.255	0.305	0.410104	0.289883	0.102489
P5	Middle	0.17	0.16	0.28	0.07	0.133333	0.165	0	0.03	0.126042	0.0899291	0.0317948	P5
	Bottom	0.06	0	0.195	0.16	0.13	0.095	0	0.08	0.09	0.0704577	0.0249106
		0.101667	0.176667	0.432778	0.343333	0.271944	0.12	0.085	0.138333
	Upper	0.09	0.275	0.396667	0.12	0.99	0.02	0.04	0.0625	0.249271	0.3261	0.115294
P6	Middle	0.16	0.17	0.02	0.09	0.05	0	0	0	0.06125	0.0712014	0.0251735	P6
	Bottom	0.13	0	0.025	0.055	0.04	0.02	0.045	0.11	0.053125	0.0448758	0.015866
		0.126667	0.148333	0.147222	0.0883333	0.36	0.0133333	0.0283333	0.0575
	Upper	0.259	0.5367	0.443	0.18	0.18	0.095	0.373	0	0.258337	0.181433	0.0641461
P7	Middle	0.23	0.03	0.195	0.08	0	0.2	0.105	0	0.105	0.0933886	0.0330179	P7
	Bottom	0.065	0	0.083	0	0	0.05	0.06	0.08	0.04225	0.0365152	0.0129101
		0.184667	0.1889	0.240333	0.0866667	0.06	0.115	0.179333	0.0266667
	Upper	0.23	0.34	0.09	0.015	0.04	0.0633333	0.435	0.09	0.162917	0.154655	0.0546787
P8	Middle	0.266667	0.07	0.193333	0.05	0	0.04	0.12667	0.115	0.107709	0.0877902	0.0310385	P8
	Bottom	0.25	0.05	0.09	0	0.05	0.05	0.08	0.186667	0.0945833	0.0826148	0.0292087
		0.248889	0.153333	0.124444	0.0216667	0.03	0.0511111	0.21389	0.130556
	Upper	0.07	0	0	0.03	0.03	0.145	0.04	0.11	0.053125	0.0518884	0.0183453
P9	Middle	0.05	0.01	0.015	0	0	0.015	0.04	0.14	0.03375	0.0465027	0.0164412	P9
	Bottom	0.01	0.04	0.04	0	0	0.03	0.08	0.15	0.04375	0.050409	0.0178223
		0.0433333	0.0166667	0.0183333	0.01	0.01	0.0633333	0.0533333	0.133333

## Sheet: T5-22.5L-1m-Head forward
plant number	Cotton canopy	East	Southeast	South	Southwest	West	Northwest	North	Northeast	Mean
											SD	SE	T5
	Upper	0.14	0.07	0	0.2	0.115	0.475	0.23	0.25	0.185	0.1439	0.0508763
P3	Middle	0.015	0.025	0	0.22	0.26	0.0742857	0.19	0	0.0980357	0.107955	0.0381679	P3
	Bottom	0.005	0.045	0.15	0	0	0.153	0.09	0.04	0.060375	0.0638054	0.0225586
		0.0533333	0.0466667	0.05	0.14	0.125	0.234095	0.17	0.0966667
	Upper	0.27	0.26	0.12	1.2966	2.2766	0.81	0.08	0.29	0.6754	0.766836	0.271117
P4	Middle	0.07	0.113333	0.195	0.855	0.265	0.15	0.19	0.05	0.236042	0.259779	0.0918456	P4
	Bottom	0	0.193333	0.0866667	0.343333	0.26	0.04	0.226667	0.08	0.15375	0.1199	0.042391
		0.113333	0.188889	0.133889	0.831644	0.933867	0.333333	0.165556	0.14
	Upper	0.0175	0.08	0.306667	1.47	1.55	0.53	0.53	0.28	0.595521	0.59368	0.209898
P5	Middle	0	0.01	0.06	1.04	0.28	1.165	0	0.17	0.340625	0.481311	0.170169	P5
	Bottom	0.13	0	0.13	0.11	0.48	0.24	0	0.1	0.14875	0.154406	0.0545906
		0.0491667	0.03	0.165556	0.873333	0.77	0.645	0.176667	0.183333
	Upper	0.45	1.06	1.06	0.64	1.095	1.85	1.57	0.805	1.06625	0.4627	0.163589
P6	Middle	0.09	0.74	0.51	0.76	0.53	0	0.39	0.09	0.38875	0.298924	0.105685	P6
	Bottom	0.325	0	0.425	0.511667	0.285	0.15	0.16	0.155	0.251458	0.167141	0.0590932
		0.288333	0.6	0.665	0.637222	0.636667	0.666667	0.706667	0.35
	Upper	0.1	1.407	0.38	0.455	0.295	0.105	0.426667	0	0.396083	0.441768	0.156189
P7	Middle	0	1.455	1.505	0.22	0	0.16	0.045	0	0.423125	0.657462	0.232448	P7
	Bottom	0.125	0	0.12	0	0.22	0.15	0.18	0.145	0.1175	0.0791924	0.0279987
		0.075	0.954	0.668333	0.225	0.171667	0.138333	0.217222	0.0483333
	Upper	1.26	1.96	0.586667	0.33	0	0.27	0.145	0.17	0.590208	0.678058	0.23973
P8	Middle	0.185	0.765	0.615	0.13	0	0.01	0.11	0.375	0.27375	0.284828	0.100702	P8
	Bottom	0.39	0.45	0.42	0	0	0.02	0.1	0.27	0.20625	0.197841	0.0699474
		0.611667	1.05833	0.540556	0.153333	0	0.1	0.118333	0.271667
	Upper	0.43	1.31	0.04	0.21	0.02	0.405	0	0	0.301875	0.444345	0.1571
P9	Middle	0	0.47	0.065	0	0	0	0.0333333	0.11	0.0847917	0.160721	0.0568235	P9
	Bottom	0.0966667	0.15	0.06	0.09	0	0.0633333	0.13	0.0233333	0.0766667	0.0506779	0.0179174
		0.175556	0.643333	0.055	0.1	0.00666667	0.156111	0.0544444	0.0444444

## Sheet: T6-22.5L-1m-Tail forward
	plant number	Cotton canopy	East	Southeast	South	Southwest	West	Northwest	North	Northeast	Mean
												SD	SE	T6
第一株		Upper	0.47	0.16	0	0.35	0.34	0.336667	0.13	0.17	0.244583	0.153612	0.05431
	P3	Middle	0.07	0.106667	0	0.385	0.24	0.09	0.24	0.04	0.146458	0.129726	0.0458652	P3
		Bottom	0.025	0.0325	0.32	0.15	0	0.15	0.32	0	0.124688	0.134751	0.0476418
			0.188333	0.0997222	0.106667	0.295	0.193333	0.192222	0.23	0.07
第二株		Upper	0.075	0.26	0.36	0.995	0.8875	0.47	0.03	0.24	0.414687	0.355403	0.125654
	P4	Middle	0.01	0.075	0.275	0.485	0.28	0	0.18	0.11	0.176875	0.164402	0.058125	P4
		Bottom	0	0.0766667	0.025	0.07	0.03	0.3	0.66	0.025	0.148333	0.227566	0.0804569
			0.0283333	0.137222	0.22	0.516667	0.399167	0.256667	0.29	0.125
第三株		Upper	0.04	0.75	0.503333	1.39	0.45	0.25	0.365	0.3	0.506042	0.412162	0.145721
	P5	Middle	0.18	0.23	0.45	2.7	0.543333	1.17	0	0.02	0.661667	0.90553	0.320153	P5
		Bottom	0.09	0	0.39	0.17	0.25	0.305	0	0.47	0.209375	0.175182	0.0619363
			0.103333	0.326667	0.447778	1.42	0.414444	0.575	0.121667	0.263333
第四株		Upper	0.245	1.315	0.5	0.28	0.873333	0.14	0.84	0.4475	0.580104	0.398865	0.14102
	P6	Middle	0.26	0.33	1.02	0	0.12	0	0.34	0.25	0.29	0.32439	0.114689	P6
		Bottom	0.81	0	0.505	0.378	0.12	0.13	0.155	0.375	0.309125	0.263356	0.0931102
			0.438333	0.548333	0.675	0.219333	0.371111	0.09	0.445	0.3575
第五株		Upper	0.785	0.993	0.57	0.685	0.18	0.195	0.293	0	0.462625	0.346513	0.122511
	P7	Middle	0.19	0.4	0.58	0.1	0	0.17	0.1625	0	0.200313	0.198856	0.0703062	P7
		Bottom	0.2	0	0.54	0	0.115	0.2	0.2	0.255	0.18875	0.171063	0.0604799
			0.391667	0.464333	0.563333	0.261667	0.0983333	0.188333	0.2185	0.085
第六株		Upper	0.88	0.51	0.976667	0.1	0.14	0.216667	0.06	0.445	0.416042	0.354929	0.125486
	P8	Middle	0.553333	0.215	0.55	0.2	0.075	0.02	0.0933333	0.025	0.216458	0.218903	0.077394	P8
		Bottom	0.47	0.01	0.23	0	0.08	0.16	0	0.39	0.1675	0.182659	0.0645797
			0.634444	0.245	0.585556	0.1	0.0983333	0.132222	0.0511111	0.286667
第七株		Upper	0.53	0.71	0.13	0.12	0.15	0.15	0	0.215	0.250625	0.240542	0.0850443
	P9	Middle	0.15	0.135	0.133333	0.07	0.065	0.05	0.08	0	0.0854167	0.0509337	0.0180078	P9
		Bottom	0.173333	0.05	0.12	0.1	0.12	0.22	0.23	0.09	0.137917	0.0638932	0.0225897
			0.284444	0.298333	0.127778	0.0966667	0.111667	0.14	0.103333	0.101667

## Sheet: T7-22.5L-2m-Head forward
plant number	Cotton canopy	East	Southeast	South	Southwest	West	Northwest	North	Northeast	Mean
											SD	SE	T7
	Upper	0.85	0.07	0	0.52	0.6	0.466667	0.72	0.065	0.411458	0.325975	0.11525
P3	Middle	0.095	0.136667	0	0.305	0.2	0.445	0.9	0	0.260208	0.299305	0.10582	P3
	Bottom	0.015	0.192	0.63	0.04	0	0.304286	0.34	0	0.190161	0.225037	0.0795624
		0.32	0.132889	0.21	0.288333	0.266667	0.405317	0.653333	0.0216667
	Upper	0.115	0.03	0.04	1.38	1.315	0.95	0.03	0.17	0.50375	0.603743	0.213455
P4	Middle	0	0.42	0.47	0.95	0.365	0.215	0.46	0.01	0.36125	0.304006	0.107482	P4
	Bottom	0	0.0333333	0.0233333	0.0933333	0.23	0.4	0.373333	0.098	0.156417	0.158799	0.0561438
		0.0383333	0.161111	0.177778	0.807778	0.636667	0.521667	0.287778	0.0926667
	Upper	0.175	0.06	0.26	1.45	0.575	0.15	0.48	0.48	0.45375	0.44258	0.156476
P5	Middle	0.1	0.69	0.28	0.06	1.12	1.055	0	0.33	0.454375	0.446058	0.157705	P5
	Bottom	0.38	0	0.36	0.495	0.2	0.54	0	0.08	0.256875	0.216843	0.0766657
		0.218333	0.25	0.3	0.668333	0.631667	0.581667	0.16	0.296667
	Upper	0.415	1.235	1.17	1.28	1.10667	0.41	0.72	0.1075	0.805521	0.453023	0.160168
P6	Middle	0.085	0.445	0.56	0	0.23	0	0.09	0.41	0.2275	0.218403	0.0772172	P6
	Bottom	0.545	0	0.275	0.361667	0.09	0.09	0.11	0.07	0.192708	0.184995	0.0654054
		0.348333	0.56	0.668333	0.547222	0.475556	0.166667	0.306667	0.195833
	Upper	0.8	0.856667	0.8275	0.79	0.07	0	0.1367	0	0.435108	0.412617	0.145882
P7	Middle	0.525	0	0.085	0	0.525	0	0.13	0.25	0.189375	0.223917	0.0791666	P7
	Bottom	0	0.115	0.445	0	0	0.29	0.21	0	0.1325	0.168608	0.0596118
		0.441667	0.323889	0.4525	0.263333	0.198333	0.0966667	0.1589	0.0833333
	Upper	0.79	1.16	0.543333	0.07	0.04	0.113333	0.575	0.325	0.452083	0.393786	0.139224
P8	Middle	0.273333	0.71	0.49	0.36	0.06	0.02	0.14	0.065	0.264792	0.243609	0.086129	P8
	Bottom	0.82	0.04	0.38	0	0.14	0.6	0	0.45	0.30375	0.307615	0.108758
		0.627778	0.636667	0.471111	0.143333	0.08	0.244444	0.238333	0.28
	Upper	0.66	0.36	0.22	0.09	0.12	0.05	0.34	0.155	0.249375	0.200258	0.0708018
P9	Middle	0.255	0.515	0.403333	0.14	0.22	0.06	0.16	0.04	0.224167	0.16463	0.0582056	P9
	Bottom	0.07	0.38	0.25	0.13	0.3	0.126667	0.04	0.07	0.170833	0.124081	0.0438692
		0.328333	0.418333	0.291111	0.12	0.213333	0.0788889	0.18	0.0883333

## Sheet: T8-22.5L-2m-Tail forward
	plant number	Cotton canopy	East	Southeast	South	Southwest	West	Northwest	North	Northeast	Mean
												SD	SE	T8
		Upper	0.475	0.14	0	0.27	0.3	0.35	0.19	0.05	0.221875	0.158293	0.0559651
P3	P3	Middle	0.12	0.11	0	0.245	0.2	0.201429	0.13	0.14	0.143304	0.0749392	0.026495	P3
		Bottom	0.01	0.118	0.26	0.12	0	0.175	0.1	0	0.097875	0.0925919	0.0327362
			0.201667	0.122667	0.0866667	0.211667	0.166667	0.242143	0.14	0.0633333
		Upper	0.095	0.13	0.42	0.64	0.63	0.46	0.23	0.16	0.345625	0.221447	0.0782934
P4	P4	Middle	0.19	0.235	0.84	0.715	0.675	0.225	0.04	0.095	0.376875	0.313676	0.110901	P4
		Bottom	0	0.133333	0.025	0.34	0.16	0.29	0.24	0.118	0.163292	0.120661	0.0426601
			0.095	0.166111	0.428333	0.565	0.488333	0.325	0.17	0.124333
		Upper	0.265	0.12	0.403333	0.97	0.75	0.44	0.64	0.515	0.512917	0.271098	0.0958477
P5	P5	Middle	0.1	0.13	0.22	0.41	0.34	0.465	0	0.125	0.22375	0.164897	0.0582999	P5
		Bottom	0.05	0	0.125	0.09	0.46	0.31	0	0.42	0.181875	0.187349	0.0662378
			0.138333	0.0833333	0.249444	0.49	0.516667	0.405	0.213333	0.353333
		Upper	1.31	0.955	0.773333	1.86	0.546667	0	1.71	1.1	1.03188	0.609518	0.215497
P6	P6	Middle	0.94	1.02	1.37	0	1.06	0	1.18	0.32	0.73625	0.545473	0.192854	P6
		Bottom	0.85	0	0.565	0.286	0.35	0.02	0.24	0.22	0.316375	0.280733	0.099254
			1.03333	0.658333	0.902778	0.715333	0.652222	0.00666667	1.04333	0.546667
		Upper	1.36	0.93	0.557	0.495	0.185	0.325	0.673333	0	0.565667	0.431471	0.152548
P7	P7	Middle	0.12	0.395	0.515	0.015	0	0.15	0.7	0	0.236875	0.267127	0.0944436	P7
		Bottom	0.535	0	0.22	0	0.345	0.135	0.05	0.805	0.26125	0.286951	0.101453
			0.671667	0.441667	0.430667	0.17	0.176667	0.203333	0.474444	0.268333
		Upper	0.175	0.255	0.14	0	0.18	0.213333	1.54	1.285	0.473542	0.588224	0.207969
P8	P8	Middle	0.586667	0.05	0.5075	1.46667	0.21	0	0.343333	0.395	0.444896	0.461347	0.163111	P8
		Bottom	0.15	0.345	0.393333	0	0.17	0.24	2.26	0.296667	0.481875	0.729062	0.257762
			0.303889	0.216667	0.346944	0.488889	0.186667	0.151111	1.38111	0.658889
		Upper	0.21	0.11	0.96	0.33	0.13	0.135	0.03	0.26	0.270625	0.293847	0.103891
P9	P9	Middle	0.44	0.255	0.44	0.31	0.285	0.155	0.0733333	0.09	0.256042	0.142726	0.0504611	P9
		Bottom	0.106667	0.85	0.63	0.04	0.05	0.36	0.42	0.35	0.350833	0.287528	0.101656
			0.252222	0.405	0.676667	0.226667	0.155	0.216667	0.174444	0.233333
